# Supplementary material for: Modified Hybrid Discriminant Analysis Methods and Their Applications in Machine Learning
Source: Hindawi journal article supplement (doi:10.1155/2020/1512391), 2020-02-24

The results of numerical experiments

1 The discriminant results of five methods in the abalone data set


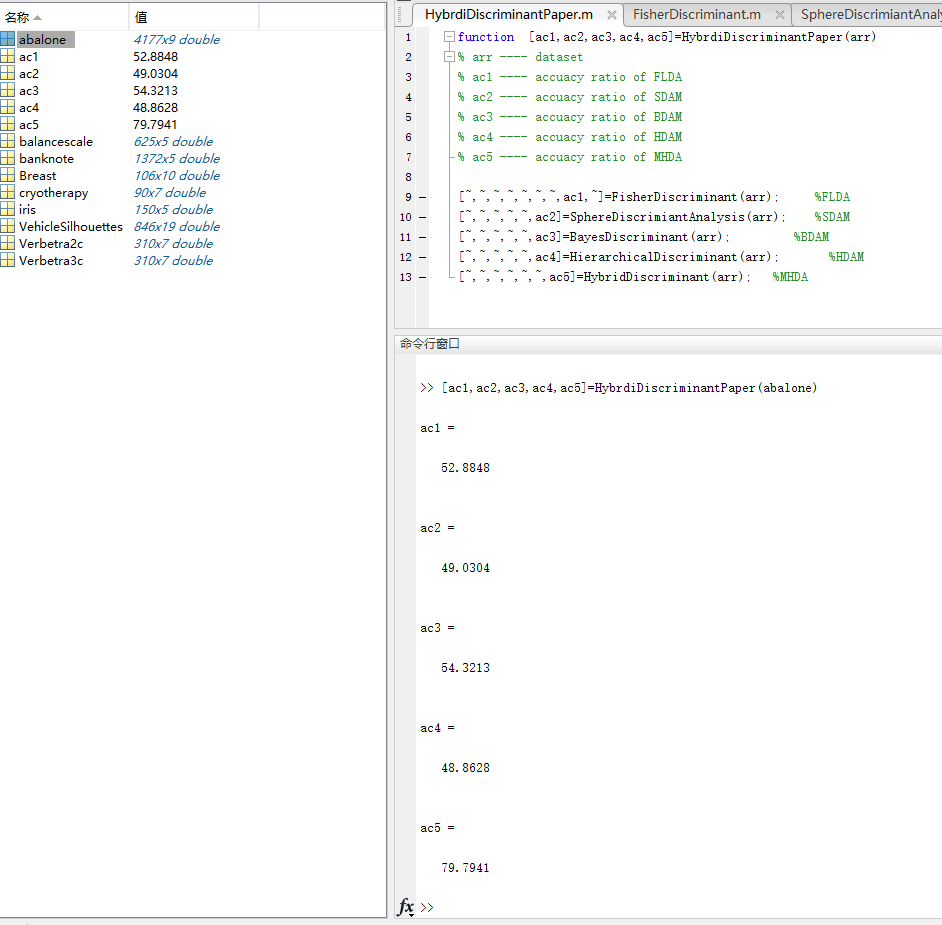


2 The discriminant results of five methods in the balance scale data set


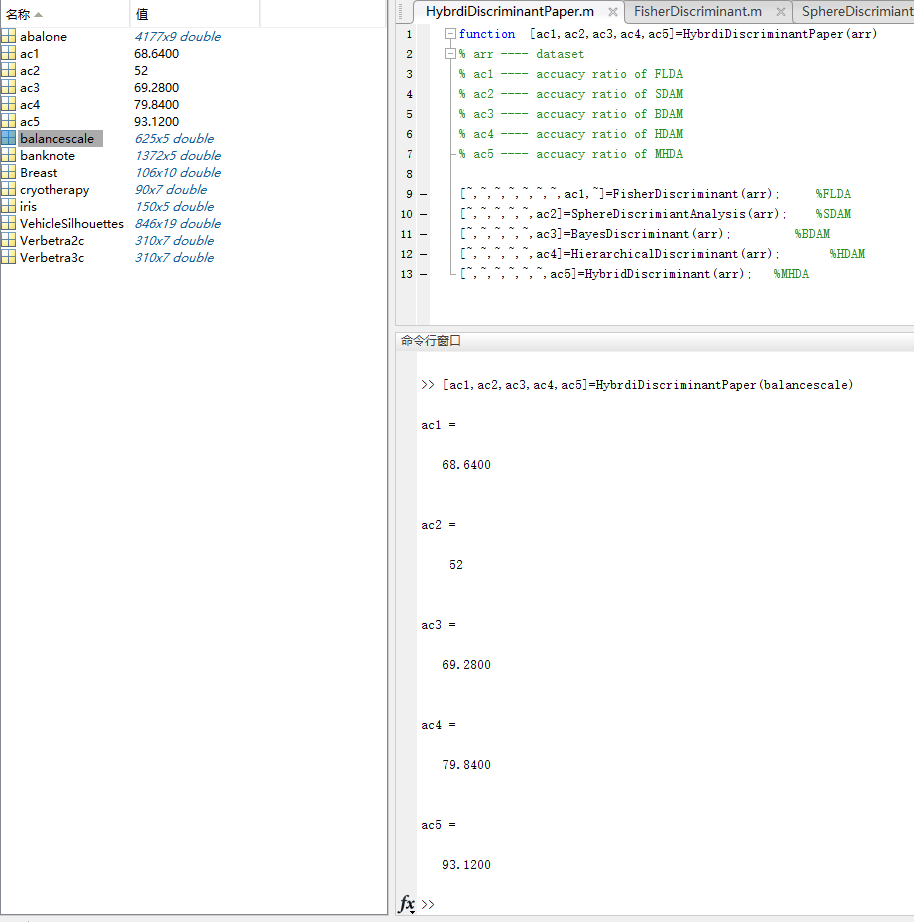


3 The discriminant results of five methods in the banknote authentication data set


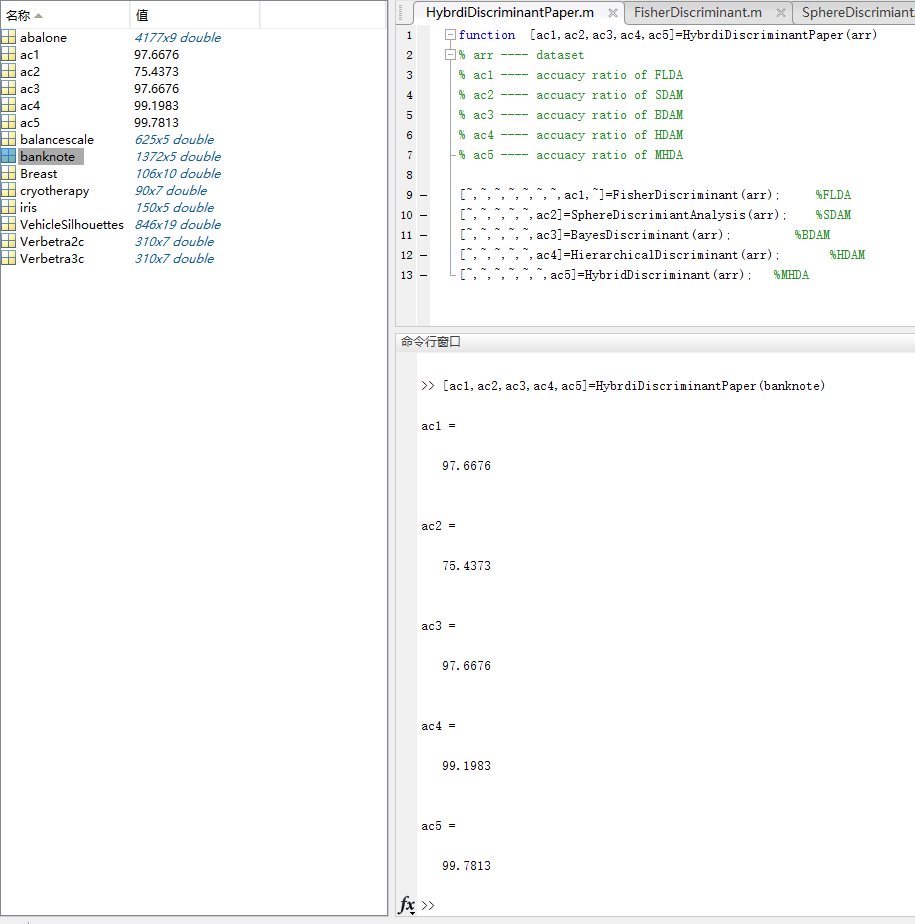


4 The discriminant results of five methods in the breast tissue data set


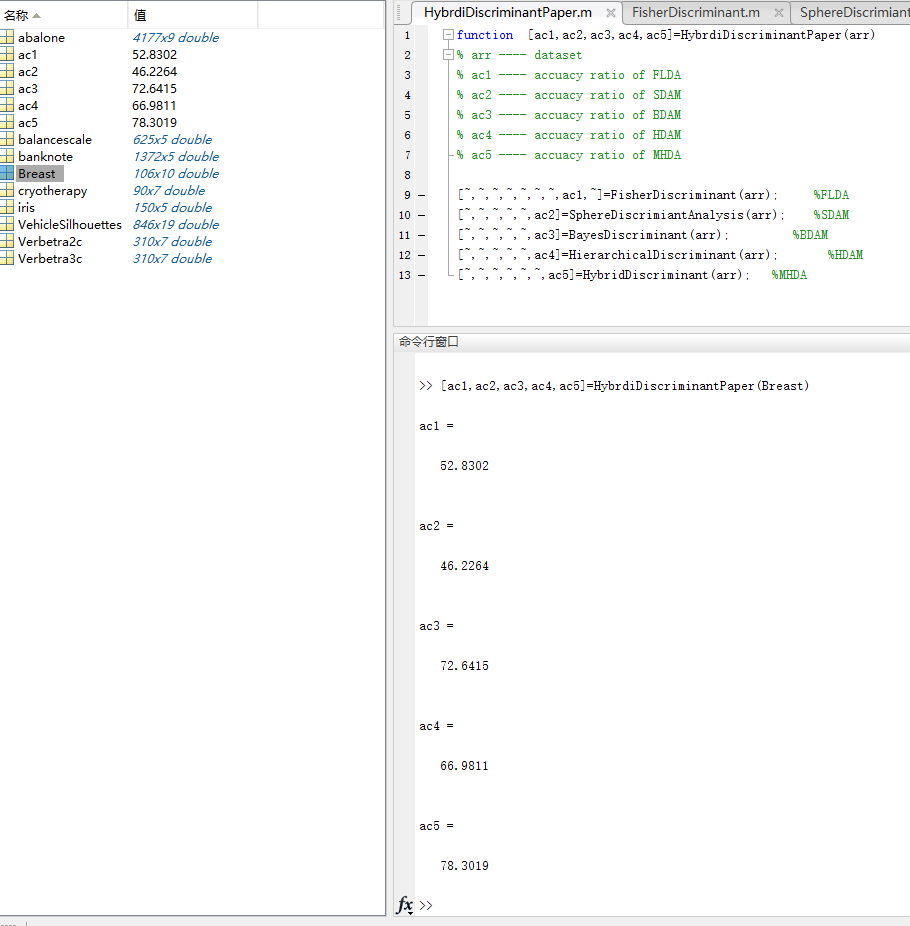


5 The discriminant results of five methods in the cryotherapy data set


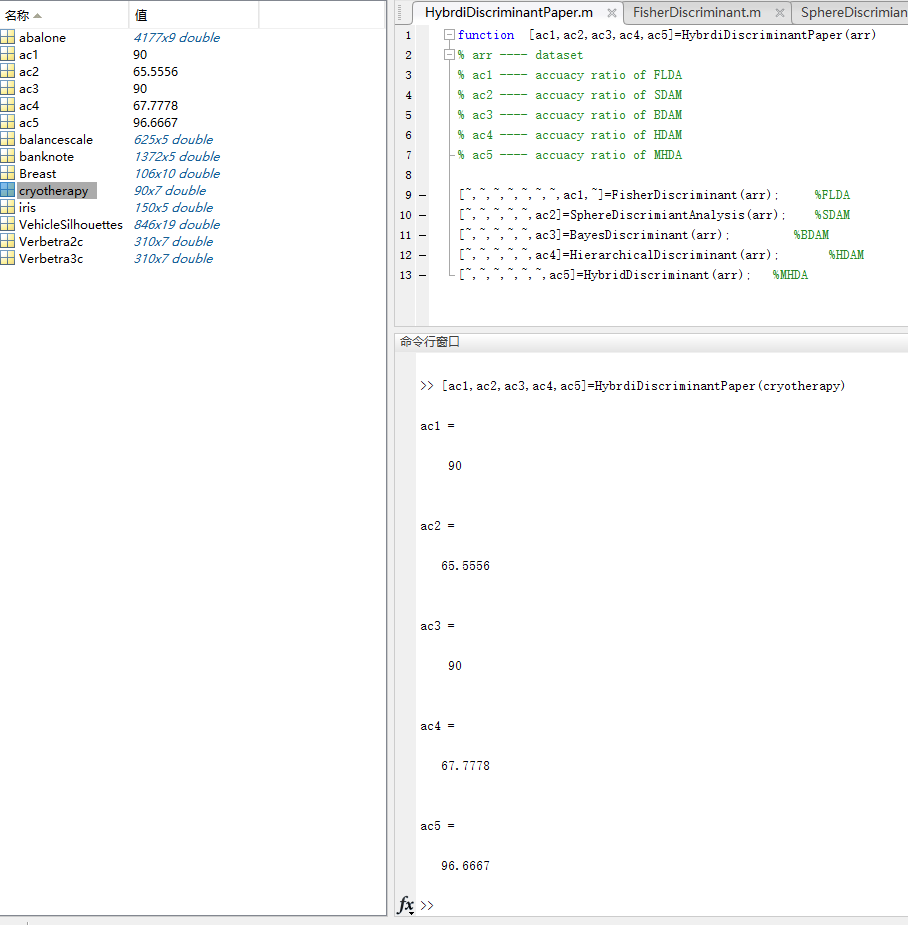


6 The discriminant results of five methods in the iris data set


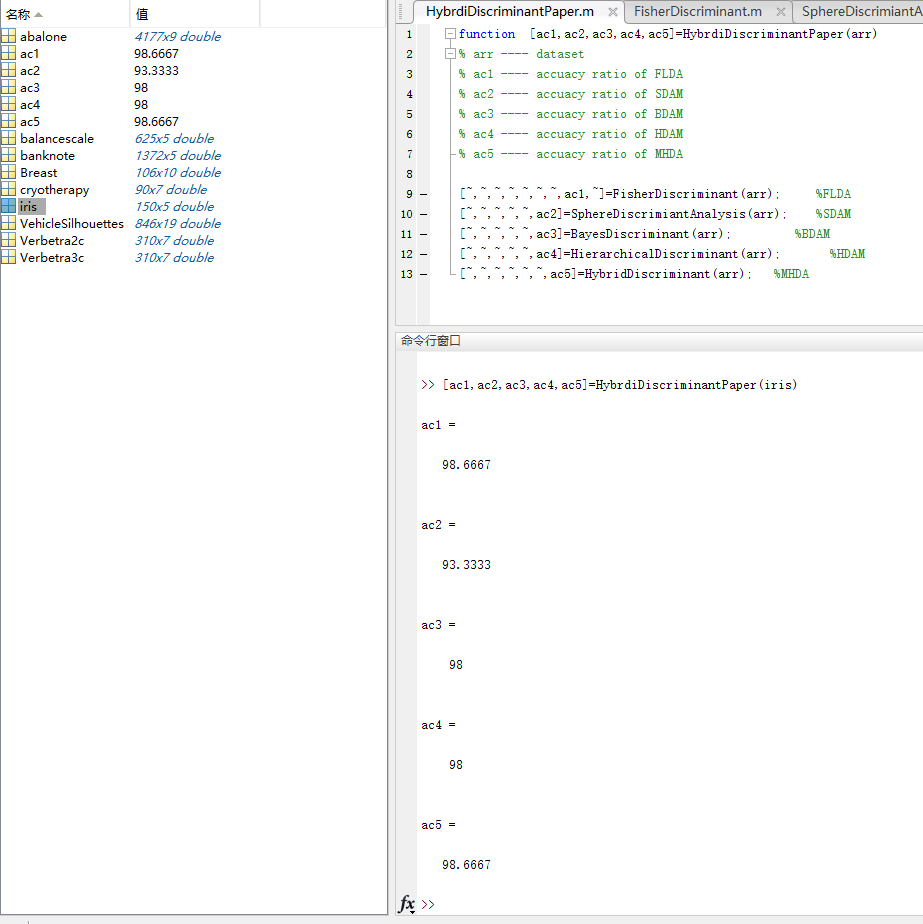


7 The discriminant results of five methods in the vehicle silhouettes data set


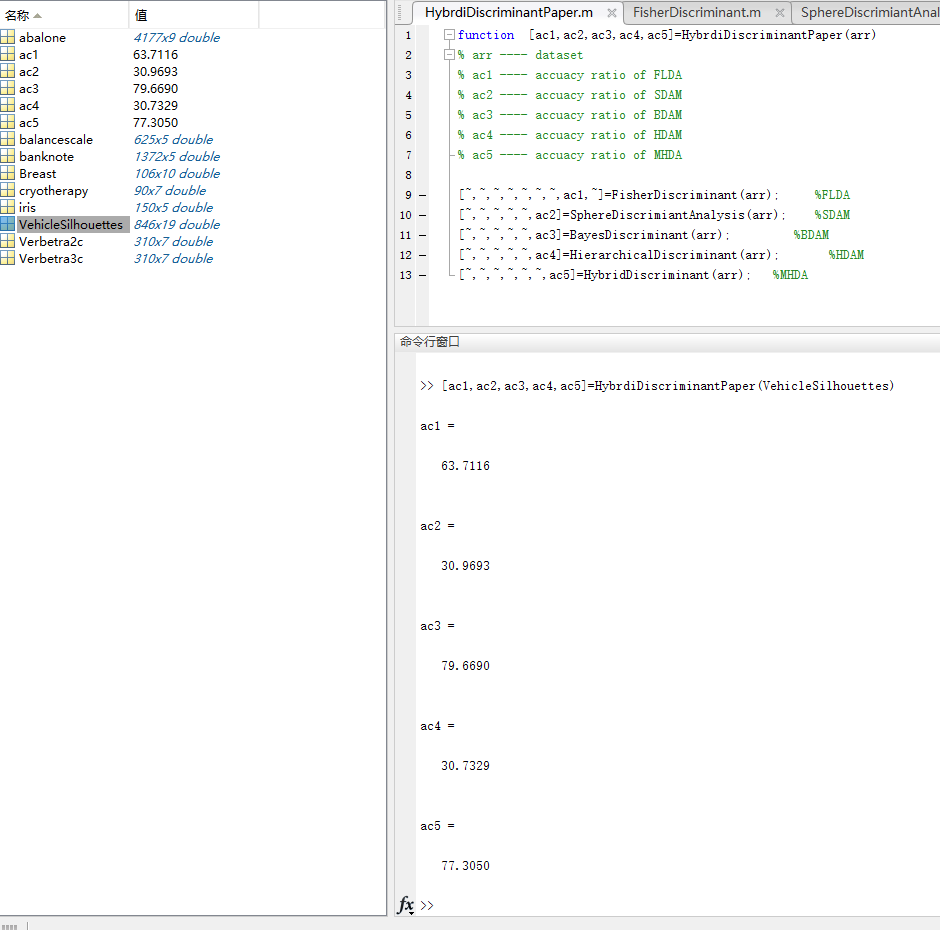


8 The discriminant results of five methods in the vertebral2c data set


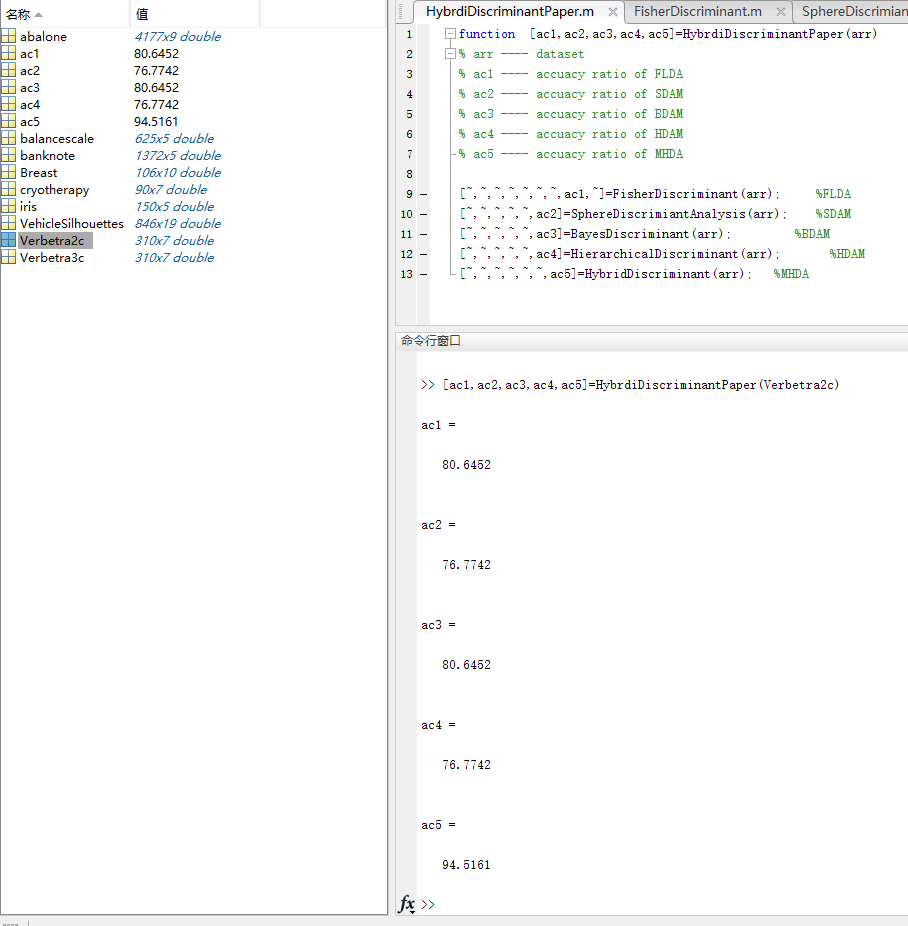


9 The discriminant results of five methods in the vertebral3c data set


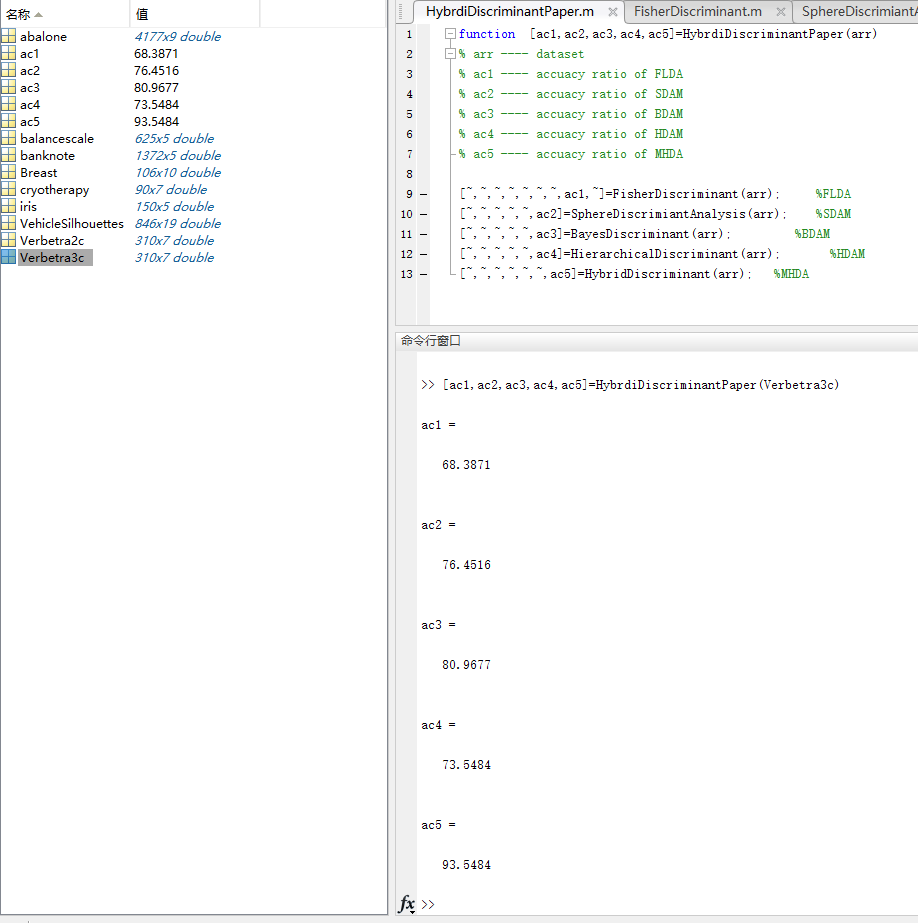

Supplement: f1 [file 1512391.f1.zip › 1512391.f1/supplementary material (1).docx]
