# Supplementary material for: Modified Hybrid Discriminant Analysis Methods and Their Applications in Machine Learning
Source: Hindawi journal article supplement (doi:10.1155/2020/1512391), 2020-02-24
Supplement: f1 [file 1512391.f1.zip]

Archive with 2 entries (2 files):
- 1512391.f1/supplementary information file (1).xls
- 1512391.f1/supplementary material (1).docx
