# Supplementary material for: Modified Hybrid Discriminant Analysis Methods and Their Applications in Machine Learning
Source: Hindawi journal article supplement (doi:10.1155/2020/1512391), 2020-02-24
Supplement: f1 [file 1512391.f1.zip › 1512391.f1/supplementary information file (1).xls]

## Sheet: Sheet1
Vehicle Silhouettes data set
1	85	44	70	205	103	52	149	45	19	144	241	325	188	127	9	11	180	183	1
2	107	57	106	172	50	6	255	26	28	169	280	957	264	85	5	9	181	183	1
3	97	43	73	173	65	6	153	42	19	143	176	361	172	66	13	1	200	204	1
4	88	46	74	171	68	6	152	43	19	148	180	349	192	71	5	11	189	195	1
5	94	49	79	203	71	5	174	37	21	154	196	465	206	71	6	2	197	199	1
6	99	41	77	197	69	6	177	36	21	139	202	485	151	72	4	10	198	199	1
7	84	47	75	153	64	6	154	43	19	145	175	354	184	75	0	3	185	192	1
8	94	43	64	173	69	7	150	43	19	142	169	344	177	68	9	1	199	206	1
9	87	39	70	148	61	7	143	46	18	136	164	307	141	69	1	2	192	199	1
10	102	45	85	193	64	6	192	33	22	146	217	570	163	76	6	7	195	193	1
11	82	44	72	118	52	7	152	44	19	147	174	340	177	82	2	2	180	185	1
12	81	45	68	169	73	6	151	44	19	146	173	336	186	75	7	0	183	189	1
13	85	42	66	122	54	6	148	46	19	141	172	317	174	88	6	14	180	182	1
14	101	42	62	175	67	6	149	43	19	139	169	341	165	65	7	11	202	209	1
15	101	56	104	185	53	6	257	26	28	168	275	956	230	83	5	26	180	184	1
16	83	42	66	156	67	7	150	45	19	144	174	333	159	78	4	2	182	188	1
17	93	45	86	201	69	7	184	35	22	145	203	523	183	72	0	4	194	197	1
18	81	43	68	125	57	8	149	46	19	146	169	323	172	83	6	18	179	184	1
19	98	49	84	219	74	7	190	34	22	154	208	558	209	74	4	7	195	195	1
20	104	52	94	208	66	5	208	31	24	161	227	666	218	76	11	4	193	191	1
21	89	44	68	113	50	7	150	45	19	147	171	328	189	88	6	5	179	182	1
22	87	46	71	159	66	6	151	44	19	146	175	343	189	73	2	0	186	190	1
23	99	51	92	203	65	5	209	31	24	159	232	671	214	78	5	11	191	189	1
24	89	40	76	188	76	7	150	44	19	136	174	342	148	72	3	8	193	197	1
25	110	58	106	180	51	6	261	26	28	171	278	998	257	83	9	13	181	182	1
26	91	42	84	209	75	6	171	38	20	138	189	446	161	69	3	12	196	201	1
27	84	45	66	154	65	6	145	46	19	144	168	312	177	73	2	3	184	188	1
28	86	43	68	152	62	7	150	44	19	142	179	337	164	75	4	9	188	192	1
29	87	44	65	124	56	6	149	46	19	144	170	321	171	87	4	12	179	182	1
30	82	45	66	252	126	52	148	45	19	144	237	326	185	119	1	1	181	185	1
31	102	45	83	198	65	5	194	33	22	146	225	576	167	79	0	27	193	191	1
32	80	44	68	135	59	8	150	45	19	145	170	329	173	80	7	12	180	185	1
33	99	48	79	199	68	6	185	35	22	153	202	524	171	74	5	8	195	195	1
34	85	43	64	128	56	8	150	46	19	144	168	324	173	82	9	14	180	184	1
35	93	49	79	180	65	7	173	37	21	158	189	463	194	70	5	10	197	202	1
36	89	42	70	148	62	7	147	45	19	143	176	323	153	76	2	6	186	189	1
37	85	41	66	155	65	22	149	45	19	139	173	330	155	75	6	16	184	191	1
38	100	48	95	209	68	7	199	32	23	150	216	605	200	73	7	11	192	194	1
39	81	42	63	125	55	8	149	46	19	145	166	320	172	86	7	7	179	182	1
40	80	43	68	120	54	8	150	45	19	145	171	329	176	85	4	8	179	183	1
41	91	40	76	171	67	7	149	44	19	135	169	332	144	68	4	17	192	200	1
42	94	44	84	216	74	6	184	35	22	145	208	525	154	73	4	22	196	197	1
43	110	56	103	223	64	5	250	26	27	169	280	928	239	85	4	6	184	183	1
44	82	45	68	139	64	6	147	46	19	143	169	320	184	80	0	1	181	184	1
45	106	54	103	161	47	4	247	27	27	166	266	892	242	85	4	11	181	183	1
46	96	49	98	187	59	6	213	31	24	152	228	680	210	77	8	28	188	189	1
47	88	40	78	186	73	6	158	41	20	134	185	379	148	73	1	11	193	197	1
48	89	44	72	160	66	7	144	46	19	147	166	312	169	69	11	1	191	198	1
49	93	37	73	174	68	7	151	43	19	131	175	347	135	68	1	22	196	205	1
50	91	42	66	169	66	7	145	44	19	140	169	325	159	67	4	0	201	207	1
51	100	41	75	205	71	5	176	36	21	138	204	479	151	72	7	19	197	197	1
52	91	42	81	193	69	5	169	38	20	137	184	434	156	68	3	23	198	204	1
53	107	55	98	199	59	7	240	27	26	168	258	866	245	80	3	1	186	184	1
54	86	43	66	130	56	7	152	44	19	142	177	340	173	81	6	14	181	185	1
55	82	44	72	150	64	7	154	44	19	144	181	350	177	80	0	16	183	187	1
56	81	46	71	130	56	7	153	44	19	149	172	342	191	81	3	14	180	186	1
57	82	44	72	136	61	7	147	46	19	143	173	317	183	81	6	17	181	185	1
58	85	42	64	121	55	7	149	46	19	146	167	323	172	85	1	6	179	182	1
59	86	46	70	149	65	8	149	45	19	146	170	331	185	77	6	6	183	188	1
60	90	41	71	169	68	7	150	44	19	138	175	336	157	71	3	18	192	197	1
61	104	49	89	168	54	4	212	31	24	153	238	682	198	78	1	23	190	189	1
62	83	44	68	144	61	8	147	45	19	143	170	325	180	74	1	1	185	191	1
63	100	50	81	197	67	6	186	34	22	158	206	531	198	74	6	1	197	198	1
64	81	44	72	139	60	6	153	44	19	146	180	347	178	81	1	15	182	186	1
65	81	44	68	120	53	6	151	45	19	147	170	333	178	86	4	5	179	183	1
66	96	37	74	199	74	5	165	39	20	128	188	419	136	72	1	3	196	200	1
67	85	45	65	128	56	8	151	45	19	145	170	332	186	81	1	10	179	184	1
68	79	47	74	141	61	7	153	43	19	149	175	349	199	77	6	10	183	189	1
69	85	42	59	132	58	7	149	46	19	144	166	320	172	83	8	4	179	182	1
70	95	36	73	191	73	6	156	41	19	126	184	374	124	71	2	19	199	204	1
71	94	43	68	170	67	6	142	46	18	142	164	310	177	65	10	8	198	203	1
72	80	45	71	128	56	7	151	45	19	147	171	337	176	79	3	16	181	187	1
73	86	42	65	116	53	6	152	45	19	141	175	335	172	85	5	4	179	183	1
74	82	45	68	150	69	5	148	45	19	144	169	322	184	80	5	0	181	184	1
75	107	57	106	179	51	8	257	26	28	172	275	954	232	83	2	20	181	184	1
76	87	44	70	179	75	6	146	45	19	141	167	326	178	69	6	1	194	201	1
77	83	46	73	137	59	6	148	45	19	146	167	327	183	75	8	0	185	191	1
78	94	37	73	186	71	7	154	42	19	127	171	362	132	67	2	8	197	206	1
79	82	43	73	154	65	7	151	44	19	143	178	341	160	76	5	11	185	189	1
80	86	46	73	125	57	6	151	45	19	147	170	334	188	82	9	11	180	184	1
81	83	41	70	155	65	7	144	46	19	141	168	309	147	71	4	12	188	195	1
82	87	42	76	159	65	5	155	42	19	138	184	362	157	76	6	12	189	193	1
83	109	55	102	169	51	6	241	27	26	165	265	870	247	84	10	11	184	183	1
84	90	38	75	164	64	7	151	43	19	131	168	345	139	66	0	0	195	204	1
85	98	52	86	207	69	5	192	33	22	161	212	570	221	75	4	6	194	195	1
86	98	40	77	171	61	6	172	37	21	139	197	457	141	72	4	17	199	201	1
87	94	37	72	193	72	6	158	41	19	133	184	385	127	70	0	14	200	204	1
88	85	45	70	130	58	8	151	45	19	146	171	334	187	79	2	5	181	186	1
89	86	45	73	152	63	6	149	44	19	145	170	335	176	71	6	1	189	196	1
90	82	41	70	155	64	7	148	45	19	138	172	328	152	72	5	17	187	195	1
91	90	42	63	126	55	7	152	45	19	142	173	336	173	81	0	15	180	184	1
92	102	51	92	194	60	6	220	30	25	162	247	731	209	80	7	7	188	186	1
93	113	57	109	194	56	6	260	26	28	175	288	982	261	85	11	21	182	183	1
94	87	43	65	127	56	8	149	46	19	143	169	322	171	85	6	3	180	182	1
95	82	44	63	123	54	7	151	45	19	147	166	329	185	81	3	4	179	182	1
96	86	42	65	125	54	7	150	45	19	140	171	327	172	85	2	8	180	182	1
97	107	57	102	184	55	7	234	28	26	171	243	822	229	77	7	11	187	187	1
98	99	51	88	188	62	5	203	32	23	158	222	625	219	77	8	26	191	190	1
99	87	41	73	158	64	7	151	44	19	138	175	341	152	73	3	8	190	194	1
100	89	40	72	155	63	7	146	45	19	135	175	321	145	72	4	10	192	196	1
101	101	54	106	188	57	7	236	28	26	164	256	833	253	81	6	14	185	185	1
102	81	47	69	146	64	6	151	44	19	147	171	340	195	75	5	0	183	188	1
103	91	45	76	171	69	7	150	44	19	144	170	340	179	69	12	1	195	201	1
104	84	45	68	148	64	6	146	46	19	142	168	317	180	75	5	1	183	187	1
105	96	41	77	177	64	5	177	36	21	134	205	485	148	74	0	4	196	198	1
106	97	45	72	187	71	5	161	40	20	144	178	399	186	70	7	7	196	203	1
107	96	47	77	204	72	6	167	38	20	150	188	429	182	69	6	16	199	203	1
108	109	52	95	189	58	4	227	29	25	158	262	776	217	82	0	19	187	186	1
109	106	54	100	227	67	4	250	27	27	162	280	923	262	88	5	11	182	182	1
110	81	46	71	141	61	7	153	44	19	148	177	347	190	80	1	14	182	187	1
111	86	42	65	113	50	8	152	45	19	141	169	332	171	85	4	16	179	183	1
112	86	47	75	165	68	6	154	43	19	146	176	356	190	74	7	3	188	194	1
113	108	57	106	177	51	5	256	26	28	170	285	966	261	87	11	2	182	181	1
114	89	41	75	162	66	5	153	43	19	136	175	352	154	72	2	0	188	195	1
115	98	38	70	186	68	6	164	39	20	136	189	413	129	71	3	17	200	203	1
116	88	40	73	173	68	7	150	44	19	137	174	341	151	69	2	20	196	200	1
117	86	45	71	155	66	7	146	45	19	144	167	322	176	72	5	6	189	196	1
118	80	43	71	133	60	7	150	45	19	146	170	330	176	81	6	15	180	184	1
119	89	44	70	158	64	6	141	47	18	143	164	299	173	66	9	11	193	199	1
120	96	36	74	183	70	6	149	43	19	127	178	341	127	69	0	17	201	205	1
121	87	43	70	169	72	7	152	44	19	145	177	341	171	76	6	12	184	187	1
122	85	45	70	120	54	7	149	45	19	145	169	326	186	81	8	4	181	184	1
123	99	47	91	226	74	5	202	32	23	148	234	629	186	79	4	11	192	191	1
124	85	42	70	130	56	7	150	45	19	145	177	328	172	82	10	14	181	185	1
125	102	53	101	238	72	4	238	28	26	163	267	844	242	85	7	22	184	184	1
126	101	53	91	194	65	6	204	32	23	161	231	636	214	78	5	14	192	192	1
127	91	46	75	185	75	7	154	42	19	147	178	362	192	72	8	8	192	199	1
128	95	43	71	159	64	6	145	45	19	141	169	322	171	67	8	4	195	200	1
129	81	43	68	139	62	7	149	46	19	145	172	323	171	83	1	14	180	184	1
130	100	49	80	206	70	6	183	35	21	156	206	517	198	73	3	13	198	199	1
131	82	43	71	154	68	7	150	45	19	143	171	330	173	78	7	11	181	186	1
132	78	43	70	147	65	8	147	46	19	145	169	319	168	77	1	12	181	186	1
133	105	50	93	173	54	4	222	30	25	159	254	735	206	83	4	12	186	184	1
134	94	45	89	213	71	5	186	35	22	145	204	533	182	71	4	13	195	198	1
135	86	42	64	122	54	6	148	46	19	143	170	319	171	87	1	3	179	182	1
136	83	46	71	156	70	6	151	44	19	147	174	338	198	80	3	11	181	186	1
137	85	43	66	130	57	6	151	45	19	143	173	333	168	86	4	9	180	183	1
138	106	54	105	164	48	5	247	27	27	165	269	891	243	84	12	1	181	182	1
139	94	45	72	179	69	6	156	41	19	144	181	373	191	69	5	5	193	198	1
140	86	43	70	126	56	6	148	46	19	145	166	317	171	86	6	9	179	182	1
141	95	47	73	195	70	7	167	38	20	152	184	430	185	69	9	19	200	206	1
142	86	43	61	119	53	8	150	46	19	144	169	326	172	85	8	8	179	182	1
143	107	55	103	167	49	7	252	27	28	172	269	904	239	83	5	30	179	186	1
144	109	55	96	191	57	6	241	28	26	170	267	857	242	85	8	9	184	184	1
145	92	45	74	187	74	7	157	41	19	143	179	375	183	70	8	6	195	201	1
146	88	43	70	177	74	19	152	44	19	143	180	342	168	76	1	9	186	189	1
147	88	44	70	151	61	8	143	46	18	143	163	311	173	68	7	8	196	203	1
148	94	39	75	184	72	8	155	42	19	133	175	365	145	70	4	5	192	200	1
149	86	45	66	126	57	8	148	46	19	145	170	321	186	86	0	7	179	182	1
150	108	56	102	246	75	6	239	28	26	167	264	855	228	82	9	13	186	185	1
151	85	43	66	121	54	7	150	46	19	147	169	324	175	87	0	5	179	182	1
152	98	35	70	182	68	5	155	41	19	124	184	371	117	71	3	22	202	205	1
153	86	43	69	123	54	6	150	46	19	144	174	325	177	87	3	7	180	182	1
154	85	42	66	120	53	7	149	45	19	145	173	325	163	85	5	4	180	182	1
155	100	51	89	199	65	6	201	32	23	159	219	622	205	74	6	7	193	193	1
156	84	44	65	128	55	8	150	46	19	148	169	325	176	82	1	11	179	183	1
157	79	43	72	141	62	8	153	44	19	144	175	344	174	78	0	8	182	188	1
158	96	43	82	161	55	5	186	34	22	141	215	534	162	75	0	6	195	196	1
159	98	46	77	199	71	7	166	39	20	150	184	422	180	69	13	9	200	203	1
160	87	42	60	116	51	6	150	46	19	141	169	324	171	85	2	14	178	182	1
161	92	37	75	191	71	6	161	40	20	128	180	393	135	69	1	14	195	202	1
162	83	44	70	166	69	5	143	46	18	143	166	306	170	69	7	6	188	193	1
163	88	44	71	165	70	7	144	46	19	141	167	312	172	71	4	4	188	193	1
164	98	51	84	207	72	7	184	35	21	161	199	520	198	72	9	11	196	199	1
165	86	44	70	140	64	6	148	45	19	145	170	322	185	82	10	1	181	183	1
166	86	44	65	129	56	6	152	45	19	150	168	331	177	83	4	13	178	183	1
167	97	49	76	203	73	7	178	36	21	157	194	487	186	72	0	7	197	200	1
168	84	43	76	180	75	7	155	43	19	143	180	359	173	77	5	12	185	190	1
169	95	43	83	198	69	6	177	36	21	139	189	484	163	68	6	4	196	198	1
170	90	38	79	185	69	6	160	40	20	130	178	393	133	66	2	14	198	205	1
171	84	42	76	156	64	7	151	44	19	143	179	339	157	75	0	20	187	193	1
172	85	44	66	125	58	6	148	45	19	145	170	323	185	84	8	1	180	183	1
173	97	47	88	183	60	7	197	33	23	148	214	596	201	74	8	0	192	191	1
174	82	43	73	158	68	7	151	44	19	145	181	337	173	80	2	17	183	188	1
175	105	51	80	207	71	6	195	33	22	159	214	579	188	75	6	20	194	194	1
176	86	45	70	122	56	7	148	45	19	144	170	324	186	84	9	5	180	183	1
177	89	41	76	183	73	7	157	42	19	136	181	373	153	74	8	12	191	195	1
178	96	46	70	194	70	6	167	39	20	148	183	427	171	69	17	10	200	203	1
179	110	56	109	199	57	5	251	27	27	169	272	928	268	82	11	10	183	183	1
180	99	38	74	184	66	6	164	39	20	131	193	414	137	71	2	22	200	202	1
181	85	42	66	120	53	7	149	46	19	143	169	321	160	85	10	7	180	182	1
182	106	57	107	235	67	6	262	26	28	171	285	987	260	86	9	31	180	184	1
183	86	45	71	170	70	6	146	45	19	146	172	321	189	71	10	8	187	191	1
184	92	37	75	184	70	6	154	42	19	131	184	363	127	71	0	4	198	202	1
185	83	42	71	152	64	7	149	45	19	142	172	331	158	74	2	2	184	190	1
186	102	54	98	201	61	6	225	29	25	165	246	766	231	79	9	14	188	187	1
187	94	44	70	186	72	8	153	42	19	144	171	361	178	67	7	2	199	206	1
188	96	46	74	202	74	5	163	39	20	149	185	408	191	70	7	8	196	200	1
189	96	44	68	190	70	7	155	41	19	145	179	372	166	67	5	7	202	206	1
190	103	52	103	170	52	7	236	28	26	160	254	816	250	82	3	23	183	184	1
191	114	57	102	181	52	6	257	26	28	169	287	968	261	85	2	21	182	184	1
192	105	51	93	160	51	7	217	30	24	165	240	703	208	81	9	25	188	188	1
193	100	50	98	204	63	6	218	30	24	156	232	719	213	77	8	7	189	189	1
194	87	39	74	165	66	6	145	45	19	134	173	318	139	70	3	21	195	200	1
195	85	43	69	141	62	7	152	44	19	145	178	341	179	84	1	4	181	184	1
196	80	43	68	123	53	7	150	46	19	147	169	327	176	81	7	14	179	184	1
197	100	36	73	199	73	6	162	40	20	127	189	401	125	72	6	19	200	204	1
198	81	45	68	137	60	7	152	45	19	151	167	333	179	81	3	13	179	183	1
199	84	43	70	123	54	8	151	45	19	146	173	332	176	81	1	12	181	184	1
200	88	39	70	166	66	7	148	44	19	134	167	332	143	69	5	13	193	201	1
201	80	44	68	120	53	8	151	45	19	146	170	333	190	80	4	16	180	185	1
202	87	42	70	139	59	7	149	45	19	142	177	327	156	78	6	9	185	188	1
203	97	38	75	188	68	6	171	37	20	129	199	450	137	74	2	6	197	199	1
204	106	53	98	154	47	4	237	28	26	164	263	838	222	82	4	17	185	184	1
205	85	43	66	123	56	6	148	46	19	145	166	319	171	85	6	11	179	182	1
206	85	43	66	120	54	5	148	46	19	145	168	320	174	87	8	2	179	181	1
207	98	46	88	191	63	6	192	34	22	147	215	563	174	73	2	26	194	197	1
208	87	41	76	165	67	7	148	45	19	140	171	327	152	72	7	13	188	195	1
209	92	39	76	180	71	6	152	43	19	131	179	350	143	72	6	14	195	200	1
210	93	47	84	205	71	7	176	36	21	152	190	476	201	70	7	19	198	201	1
211	81	43	68	148	64	7	150	45	19	144	175	330	171	80	1	2	182	185	1
212	83	46	68	139	59	6	150	44	19	146	172	336	183	74	5	3	185	191	1
213	98	38	72	192	69	5	166	38	20	131	189	427	138	70	1	3	200	202	1
214	85	43	66	123	55	7	150	45	19	146	172	326	173	83	4	15	180	183	1
215	81	45	68	154	69	22	151	45	19	147	186	335	186	88	1	10	180	185	1
216	97	37	70	173	66	7	151	43	19	129	167	346	119	65	0	16	201	208	1
217	100	47	70	185	70	7	162	40	20	153	179	406	172	68	9	6	200	205	1
218	111	58	105	183	51	6	265	26	29	174	285	1018	255	85	4	8	181	183	1
219	96	55	103	201	65	9	204	32	23	166	227	624	246	74	6	2	186	194	2
220	101	56	100	215	69	10	208	32	24	169	227	651	223	74	6	5	186	193	2
221	93	35	66	154	59	6	142	46	18	128	162	304	120	64	5	13	197	202	2
222	101	48	107	222	68	10	208	32	24	154	232	641	204	70	5	38	190	202	2
223	87	38	85	177	61	8	164	40	20	129	186	402	130	63	1	25	198	205	2
224	95	48	104	214	67	9	205	32	23	151	227	628	202	74	5	9	186	193	2
225	98	55	101	228	70	9	210	31	24	168	236	661	245	72	1	6	188	197	2
226	107	53	103	221	66	11	209	32	24	163	222	653	212	66	0	1	191	201	2
227	103	50	98	212	63	9	193	34	22	161	214	567	185	64	5	5	198	204	2
228	77	38	63	135	59	5	130	52	18	130	145	247	139	79	13	21	183	187	2
229	89	41	75	143	56	7	146	46	19	137	170	317	156	76	18	5	184	188	2
230	98	55	101	219	69	11	225	30	25	178	231	748	216	74	6	14	187	195	2
231	96	55	98	161	54	10	215	31	24	175	226	683	221	76	3	6	185	193	2
232	97	59	108	227	70	11	224	30	25	186	225	732	218	70	10	25	186	198	2
233	92	39	91	191	62	8	176	37	21	137	196	466	151	67	3	23	192	200	2
234	73	37	53	111	54	6	126	55	18	128	135	227	147	82	1	15	176	184	2
235	101	53	103	203	63	9	195	34	22	162	210	571	210	68	5	5	191	198	2
236	79	40	80	133	55	7	147	47	19	135	172	311	144	76	8	30	181	193	2
237	80	37	57	116	55	6	125	54	18	125	142	229	132	81	8	5	178	184	2
238	94	38	84	158	55	9	169	39	20	130	196	430	155	69	9	15	190	195	2
239	97	50	108	211	65	10	214	31	24	156	232	683	218	72	7	29	188	197	2
240	95	46	105	219	68	9	201	33	23	148	223	602	201	69	5	38	191	202	2
241	99	46	105	209	64	11	197	34	23	152	212	575	159	65	0	33	194	205	2
242	85	39	77	151	59	8	150	45	19	134	176	331	133	73	0	16	184	193	2
243	77	38	75	144	59	6	147	46	19	132	167	315	136	80	16	20	181	187	2
244	88	35	50	121	58	5	114	59	17	122	132	192	138	74	21	4	182	187	2
245	100	45	100	209	65	8	201	32	23	147	231	611	189	72	5	5	189	195	2
246	102	54	100	163	53	10	213	31	24	173	219	669	201	76	12	27	187	195	2
247	106	49	107	194	57	11	214	31	24	161	224	670	172	67	0	39	192	206	2
248	95	45	80	186	62	7	164	40	20	145	188	406	178	65	11	18	199	204	2
249	103	54	107	218	64	12	222	30	25	174	221	728	199	67	0	18	189	200	2
250	93	35	72	172	62	7	149	44	19	124	169	334	125	62	5	30	203	210	2
251	85	36	78	149	55	7	147	45	19	128	168	321	134	64	10	24	197	203	2
252	91	45	75	154	57	6	150	44	19	146	170	335	180	66	16	2	193	198	2
253	82	38	53	125	59	5	133	51	18	128	152	259	146	87	0	0	177	183	2
254	107	52	101	218	64	11	202	33	23	164	219	610	192	65	17	2	197	206	2
255	98	54	104	186	59	10	213	32	24	172	223	665	217	73	1	26	186	195	2
256	103	54	91	179	57	11	220	31	25	170	220	707	198	72	1	32	186	198	2
257	108	51	103	197	60	11	211	31	24	160	222	661	187	67	7	3	190	200	2
258	84	39	90	180	60	7	177	37	21	131	209	469	145	71	4	38	190	198	2
259	78	36	60	116	56	6	123	55	17	124	141	221	121	78	3	16	178	185	2
260	98	45	76	166	60	7	157	42	20	148	184	371	186	69	13	10	190	196	2
261	101	51	105	212	68	10	209	32	24	162	222	653	224	73	5	23	186	195	2
262	90	36	78	179	64	8	157	42	19	126	182	367	142	66	1	20	192	198	2
263	97	48	94	198	63	9	181	36	21	155	200	494	189	64	20	11	199	203	2
264	111	54	103	171	50	11	221	30	25	172	227	727	201	69	15	6	190	198	2
265	103	55	100	194	62	11	212	31	24	175	217	666	219	73	10	14	187	194	2
266	92	46	79	176	64	8	162	41	20	149	183	396	178	67	2	10	191	198	2
267	101	56	100	168	55	11	214	31	24	175	219	681	224	74	2	3	185	192	2
268	94	39	89	194	62	9	172	38	21	135	191	444	121	63	4	23	201	209	2
269	89	36	72	141	56	7	138	48	18	126	163	286	130	72	1	1	187	192	2
270	90	39	86	169	62	7	162	41	20	131	194	388	147	74	1	22	185	191	2
271	104	57	103	216	69	11	219	30	25	176	228	708	219	73	4	3	186	196	2
272	99	55	101	206	62	13	222	30	25	180	225	722	213	71	2	3	186	196	2
273	100	55	101	189	57	10	222	30	25	177	225	731	211	71	7	17	188	197	2
274	89	36	77	172	62	8	157	42	19	125	174	367	126	63	5	22	198	205	2
275	93	45	73	164	59	7	159	42	20	146	182	379	188	65	11	15	195	201	2
276	103	55	103	211	65	11	212	31	24	165	229	673	249	72	5	16	188	196	2
277	104	58	103	230	69	11	219	30	25	176	231	716	246	71	7	4	187	196	2
278	92	43	69	158	56	7	149	44	19	143	170	333	168	63	14	18	198	203	2
279	98	58	101	208	65	12	226	30	25	182	225	748	216	71	6	1	185	196	2
280	86	41	66	129	55	7	135	50	18	136	154	266	165	74	3	4	180	187	2
281	100	44	93	193	62	8	186	35	22	147	202	521	151	66	0	2	193	198	2
282	96	47	103	215	69	10	200	33	23	147	220	598	200	73	6	6	187	194	2
283	93	43	78	166	59	7	151	44	19	141	182	342	174	68	15	2	193	197	2
284	107	52	103	186	57	11	214	31	24	162	217	676	189	66	6	5	189	198	2
285	109	51	100	197	59	10	192	34	22	161	210	553	195	64	14	3	196	202	2
286	109	48	107	215	62	10	205	32	23	158	222	624	168	65	9	32	195	206	2
287	96	52	104	222	67	9	198	33	23	163	217	589	226	67	12	20	192	201	2
288	106	49	96	201	61	10	181	36	21	158	197	494	180	62	19	15	202	209	2
289	89	44	82	136	54	6	149	45	19	144	170	332	168	68	10	14	188	193	2
290	104	52	96	188	59	9	188	35	22	161	206	530	205	67	11	8	193	200	2
291	99	57	109	220	66	11	221	30	25	176	234	725	236	70	10	25	188	200	2
292	86	40	75	146	62	6	140	48	18	135	158	290	162	72	3	21	183	190	2
293	102	54	101	190	58	10	222	30	25	171	224	728	203	71	13	6	189	198	2
294	99	55	101	219	68	10	224	30	25	178	228	737	213	74	11	20	187	196	2
295	88	44	77	167	59	6	151	44	19	145	175	343	177	64	9	12	202	208	2
296	89	40	69	147	58	6	132	50	18	137	155	260	151	61	16	6	203	209	2
297	97	46	101	210	66	8	192	35	22	151	208	546	169	66	1	32	191	200	2
298	93	42	88	188	62	10	183	36	21	141	208	504	168	70	3	12	189	197	2
299	87	45	82	164	60	8	156	42	19	144	181	366	174	70	2	2	190	196	2
300	100	49	96	206	63	9	186	35	22	156	202	519	176	62	3	5	197	205	2
301	87	45	77	153	59	7	154	44	19	145	181	350	172	75	15	14	184	189	2
302	89	47	81	156	57	8	161	41	20	149	187	388	197	72	9	15	187	193	2
303	105	56	98	209	64	11	217	31	24	173	225	696	216	72	2	19	188	199	2
304	80	39	60	122	56	6	139	49	18	131	151	281	142	80	0	5	179	186	2
305	100	51	109	224	67	9	217	30	24	162	238	704	206	72	6	18	189	199	2
306	88	44	71	145	56	8	142	48	19	143	159	296	174	68	7	18	188	197	2
307	100	57	107	207	63	11	227	30	25	180	234	756	205	72	6	19	186	198	2
308	97	37	76	169	60	8	161	41	20	131	189	391	136	72	0	0	188	192	2
309	85	37	80	158	59	8	153	44	19	126	179	348	136	69	6	21	191	197	2
310	101	52	105	162	53	10	212	31	24	163	226	669	204	74	12	11	186	194	2
311	103	48	101	204	62	12	200	33	23	158	215	595	164	66	8	22	192	202	2
312	80	38	64	130	59	8	134	51	18	126	152	259	135	76	1	23	179	188	2
313	78	36	51	116	56	4	120	57	17	124	135	209	135	84	1	12	177	184	2
314	88	36	78	160	62	6	140	48	18	123	161	287	129	66	4	35	194	202	2
315	101	53	108	184	54	12	216	31	24	172	220	685	187	68	4	24	190	201	2
316	98	48	101	195	61	11	207	31	23	152	227	650	193	71	5	7	189	196	2
317	91	41	93	197	65	9	183	36	21	137	202	504	153	66	11	24	193	200	2
318	89	36	69	142	57	7	135	50	18	126	154	266	128	66	3	36	193	203	2
319	106	53	98	203	63	11	220	30	25	167	228	710	214	71	10	24	188	197	2
320	86	38	89	176	59	9	169	39	20	132	190	428	148	67	7	33	193	202	2
321	84	40	71	131	55	7	150	45	19	134	167	330	165	80	12	1	180	186	2
322	91	49	86	195	63	8	177	37	21	156	203	473	201	67	7	5	192	198	2
323	99	50	88	204	64	10	185	35	22	159	209	517	193	66	12	11	194	201	2
324	95	57	104	228	74	10	212	31	24	175	224	670	223	74	0	4	186	193	2
325	94	37	74	169	59	7	162	41	20	133	178	394	130	63	6	6	198	204	2
326	92	38	74	178	62	9	161	41	20	135	181	388	132	63	7	29	197	206	2
327	103	57	105	221	69	11	218	30	24	173	226	706	250	73	10	2	187	195	2
328	106	52	107	211	62	8	200	33	23	161	218	602	200	67	9	17	194	201	2
329	97	47	81	183	64	8	168	39	20	150	193	426	182	70	11	2	192	198	2
330	85	40	66	121	52	4	152	44	19	133	170	340	163	87	13	3	180	183	2
331	96	54	104	175	58	10	215	31	24	175	221	682	222	75	13	23	186	194	2
332	104	55	109	230	67	12	218	30	24	174	230	706	226	67	8	22	191	202	2
333	107	56	105	202	61	11	221	30	25	179	234	725	212	72	15	1	189	196	2
334	82	40	73	141	57	8	153	44	19	133	173	342	153	75	11	9	181	187	2
335	101	55	101	183	57	13	225	30	25	177	225	741	204	71	5	10	186	198	2
336	104	54	91	209	67	11	218	31	24	170	223	697	196	74	4	21	187	196	2
337	94	46	79	181	62	8	167	40	20	148	190	418	193	67	12	15	191	198	2
338	104	57	103	222	72	12	221	30	25	177	223	718	218	72	11	12	186	195	2
339	82	39	86	140	54	7	153	45	19	134	174	338	139	71	11	18	183	189	2
340	102	51	108	193	57	10	212	31	24	162	219	663	184	66	7	21	191	201	2
341	102	54	98	177	56	10	219	31	25	171	219	706	223	72	5	17	186	196	2
342	106	55	98	224	68	11	215	31	24	170	222	679	214	68	2	29	189	201	2
343	102	54	98	167	53	10	217	31	24	174	228	692	223	72	0	31	187	198	2
344	101	56	100	204	62	12	227	30	25	178	231	757	204	73	0	11	186	197	2
345	105	54	96	185	57	10	219	30	25	170	231	706	217	75	5	12	187	195	2
346	86	36	66	128	57	8	131	52	18	127	148	252	139	76	5	27	183	187	2
347	97	46	94	209	67	10	195	34	22	147	224	573	194	70	0	14	188	197	2
348	93	35	78	162	60	8	150	45	19	125	172	331	137	67	2	33	191	198	2
349	101	55	105	182	59	10	215	31	24	177	221	678	223	74	12	26	186	195	2
350	88	38	77	156	56	7	163	41	20	129	184	395	140	67	1	9	192	198	2
351	103	54	107	189	56	11	223	30	25	174	225	729	200	70	0	29	187	201	2
352	76	38	58	125	58	5	133	51	18	127	152	259	145	87	0	21	177	184	2
353	92	42	75	172	60	8	147	45	19	142	174	322	160	62	22	10	206	211	2
354	105	52	107	207	60	11	218	31	24	167	221	701	197	66	0	20	191	203	2
355	109	49	103	186	57	11	206	32	23	156	212	630	186	65	12	21	192	201	2
356	101	49	103	212	67	10	201	33	23	156	215	601	174	69	4	11	189	196	2
357	79	39	72	127	53	9	142	48	19	135	165	295	144	77	7	21	181	189	2
358	87	49	86	190	64	9	177	37	21	153	197	471	209	67	11	7	192	199	2
359	105	55	96	181	56	9	219	30	25	175	231	713	216	74	4	5	187	194	2
360	88	39	88	194	69	8	168	40	20	133	199	416	151	74	3	22	186	192	2
361	89	42	75	140	55	6	145	46	19	139	170	312	166	71	15	26	191	198	2
362	104	55	105	216	68	11	205	32	23	169	221	623	216	71	9	18	189	196	2
363	99	54	100	199	62	9	200	33	23	166	222	600	241	70	2	7	189	198	2
364	92	46	82	170	58	8	165	40	20	149	181	409	164	61	8	11	200	208	2
365	84	38	66	138	62	6	126	54	18	132	144	232	139	70	4	7	185	190	2
366	98	55	108	168	53	11	224	30	25	178	231	737	217	73	8	30	187	198	2
367	84	38	74	138	57	8	139	49	18	127	160	282	127	72	9	20	183	191	2
368	89	38	78	153	61	7	146	46	19	127	166	314	142	69	0	9	187	194	2
369	104	55	105	223	70	10	223	30	25	177	237	737	218	75	14	11	188	196	2
370	80	36	69	127	56	7	128	53	18	124	147	240	133	70	2	21	183	191	2
371	89	50	83	195	65	6	178	37	21	156	207	481	210	71	1	6	189	194	2
372	90	40	83	178	61	8	178	37	21	132	199	472	157	71	1	14	187	193	2
373	100	51	109	231	70	11	220	30	25	163	238	722	206	73	11	19	189	198	2
374	88	40	79	183	62	7	176	38	21	138	200	462	150	66	0	29	189	199	2
375	85	38	72	130	53	9	134	51	18	132	145	261	123	65	1	24	188	198	2
376	103	56	105	183	59	10	210	32	24	173	217	648	218	72	13	22	188	196	2
377	80	34	42	110	57	3	114	59	17	119	131	191	121	87	4	7	179	183	2
378	88	34	69	152	57	5	138	48	18	122	158	284	120	62	9	29	204	210	2
379	92	42	69	153	58	8	140	48	18	138	165	290	151	64	10	21	199	206	2
380	97	55	96	170	54	10	216	31	24	173	219	685	218	75	0	4	184	193	2
381	103	49	107	179	54	12	208	32	24	159	214	644	183	66	1	12	191	200	2
382	102	52	101	213	64	10	203	33	23	157	214	616	186	65	0	19	193	203	2
383	81	38	53	123	58	6	134	51	18	128	147	259	148	83	10	6	177	184	2
384	108	55	105	230	68	11	218	30	24	171	228	709	210	69	14	4	190	197	2
385	91	52	98	196	62	9	193	34	22	161	216	562	244	69	3	1	190	199	2
386	86	44	77	155	60	7	152	44	19	141	174	345	161	72	9	0	187	192	2
387	97	37	78	181	62	8	161	41	20	131	182	389	117	62	2	28	203	211	2
388	97	41	92	197	63	10	179	37	21	140	197	481	136	63	4	3	197	204	2
389	102	43	96	197	63	10	185	36	22	142	202	513	139	65	8	12	195	204	2
390	95	51	96	196	63	9	190	35	22	161	208	543	235	68	13	0	191	198	2
391	103	41	83	194	63	9	175	38	21	142	199	455	138	65	7	30	197	206	2
392	91	35	66	159	59	7	147	45	19	131	169	322	123	64	1	1	197	203	2
393	100	58	109	230	70	11	226	30	25	182	234	752	207	72	0	13	187	198	2
394	88	40	69	146	59	7	130	51	18	134	147	252	144	64	1	1	193	200	2
395	93	47	83	165	60	7	167	40	20	147	197	417	201	73	12	4	187	192	2
396	106	53	98	192	58	11	217	31	24	166	228	693	191	71	11	24	188	198	2
397	96	48	83	177	59	8	171	39	21	152	195	438	196	67	15	0	195	201	2
398	99	52	104	177	55	10	210	32	24	166	219	657	215	73	3	2	187	194	2
399	95	42	96	197	65	9	178	37	21	141	199	474	149	67	1	29	193	200	2
400	100	52	109	225	68	10	222	30	25	165	241	731	207	73	7	28	188	199	2
401	104	52	110	172	53	10	219	30	25	166	235	711	218	74	10	28	188	198	2
402	91	38	76	172	61	8	167	40	20	134	196	415	145	71	0	28	189	198	2
403	105	46	100	195	61	9	193	34	22	150	207	557	161	65	5	9	194	202	2
404	85	36	72	127	56	7	127	54	18	125	144	233	123	70	3	30	184	194	2
405	103	48	96	232	71	10	205	32	23	153	226	633	197	71	2	15	188	196	2
406	101	55	107	200	61	11	225	30	25	178	228	730	204	74	8	35	187	201	2
407	86	37	77	144	54	7	154	43	19	127	179	352	145	71	14	13	186	191	2
408	90	41	78	145	55	7	138	48	18	138	161	284	158	67	0	1	192	197	2
409	107	45	92	197	62	10	188	35	22	148	202	526	159	64	12	20	195	203	2
410	102	52	98	225	71	10	214	31	24	164	228	682	199	71	0	16	187	196	2
411	91	46	101	199	65	9	196	34	23	146	219	574	199	73	5	8	186	194	2
412	97	48	105	212	64	11	201	33	23	155	212	602	162	64	2	7	193	202	2
413	92	52	93	204	67	9	189	35	22	161	214	536	240	72	2	5	188	195	2
414	87	44	98	211	70	10	189	35	22	141	214	535	178	71	2	21	187	194	2
415	100	51	104	163	52	10	206	32	23	164	217	631	193	69	5	21	188	196	2
416	85	38	63	130	55	7	122	55	17	130	137	219	144	64	20	8	195	201	2
417	103	56	100	185	59	11	216	31	24	173	219	684	219	75	15	11	186	194	2
418	84	38	60	128	56	5	132	50	18	130	148	261	141	75	8	4	185	188	2
419	89	44	80	191	66	6	162	40	20	143	189	396	180	66	13	11	194	199	2
420	104	52	101	206	62	10	198	33	23	161	207	587	204	64	2	5	195	204	2
421	97	55	103	197	63	11	215	31	24	172	219	677	219	75	5	24	185	194	2
422	83	39	69	127	54	5	135	49	18	131	155	274	162	69	16	6	187	190	2
423	95	43	96	202	65	10	189	35	22	143	217	534	166	71	6	27	190	197	2
424	104	56	96	231	74	11	220	30	25	172	223	713	218	73	6	16	186	195	2
425	105	54	105	213	67	10	200	33	23	163	214	597	214	68	10	20	190	198	2
426	106	55	96	196	60	12	221	30	25	173	225	717	214	72	9	13	186	196	2
427	86	39	84	149	57	8	156	43	20	133	185	358	157	74	0	23	183	190	2
428	95	49	92	193	62	10	178	37	21	154	200	478	171	64	2	0	198	206	2
429	99	57	100	177	54	13	224	30	25	188	223	726	213	72	4	7	185	198	2
430	93	34	66	140	56	7	130	51	18	120	151	251	114	62	5	29	201	207	2
431	104	50	106	209	66	10	207	32	23	158	223	635	220	73	14	9	188	196	3
432	93	44	98	197	62	11	183	36	22	146	202	505	152	64	4	14	195	204	3
433	90	34	66	136	55	6	123	54	17	118	148	224	118	65	5	26	196	202	3
434	104	54	100	186	61	10	216	31	24	173	225	686	220	74	5	11	185	195	3
435	99	53	105	219	66	11	204	32	23	165	221	623	224	68	0	6	191	201	3
436	83	36	54	119	57	6	128	53	18	125	143	238	139	82	6	3	179	183	3
437	107	54	98	203	65	11	218	31	25	167	229	696	216	72	1	28	187	199	3
438	80	38	63	129	55	7	146	46	19	130	168	314	158	83	9	20	180	185	3
439	88	42	77	151	58	8	140	47	18	142	165	293	158	64	10	11	198	205	3
440	106	53	98	176	54	10	216	31	24	171	235	691	218	74	1	9	187	197	3
441	93	37	76	183	63	8	164	40	20	134	191	405	139	67	4	7	192	197	3
442	119	54	106	220	65	12	213	31	24	167	223	675	232	66	20	1	192	202	3
443	91	45	79	176	59	9	163	40	20	148	184	404	179	62	0	10	199	208	3
444	78	38	63	115	51	6	142	47	19	130	162	299	146	77	2	4	181	185	3
445	92	38	71	174	66	7	154	43	19	133	181	355	130	70	4	24	189	195	3
446	97	44	96	195	63	9	185	36	22	144	202	512	165	66	4	8	191	199	3
447	91	39	83	170	60	8	172	38	21	134	197	445	152	72	0	10	188	194	3
448	86	40	62	140	62	7	150	45	19	133	165	330	173	82	2	3	180	185	3
449	104	55	107	222	68	11	218	31	24	173	232	703	229	71	3	10	188	199	3
450	104	52	100	191	59	9	197	33	23	158	218	583	234	70	10	10	191	198	3
451	89	42	80	151	62	6	144	46	19	139	166	308	170	74	17	13	185	189	3
452	108	53	103	202	64	10	220	30	25	168	224	711	214	73	11	10	188	199	3
453	109	53	109	221	69	12	221	31	25	169	226	712	212	72	13	28	188	201	3
454	89	37	54	119	53	5	134	50	18	127	151	266	146	79	16	14	184	185	3
455	90	36	57	130	57	6	121	56	17	127	137	216	132	68	22	23	190	195	3
456	100	46	104	184	60	9	197	34	23	147	222	578	198	73	13	13	189	197	3
457	86	36	77	165	60	7	150	45	19	128	174	331	131	66	0	32	196	203	3
458	97	42	101	186	59	9	186	36	22	138	208	511	168	67	7	41	194	206	3
459	88	37	63	130	58	5	125	54	18	130	141	230	145	74	14	20	184	188	3
460	90	37	80	171	58	9	157	42	20	132	172	373	115	60	3	18	201	209	3
461	90	43	72	172	59	8	154	42	19	144	174	360	158	61	15	9	203	209	3
462	104	50	96	211	65	10	187	35	22	156	207	527	195	65	3	7	195	206	3
463	106	49	106	211	64	9	208	32	24	158	224	645	184	68	1	24	190	202	3
464	87	39	74	152	58	6	151	44	19	136	174	337	140	70	1	33	187	196	3
465	98	39	81	191	64	9	166	40	20	138	184	415	131	62	8	19	197	205	3
466	85	40	72	139	59	5	132	50	18	135	159	260	150	68	3	9	191	195	3
467	92	36	78	165	57	8	153	43	19	128	169	349	124	60	4	19	203	211	3
468	110	51	104	191	57	12	213	31	24	162	226	674	190	68	18	2	191	199	3
469	102	54	106	221	68	11	207	32	24	164	228	638	238	71	0	26	189	200	3
470	84	35	53	122	57	4	116	59	17	123	135	196	128	76	10	27	183	190	3
471	103	46	106	209	66	10	203	33	23	149	217	612	210	70	9	10	191	199	3
472	93	43	76	149	57	7	149	44	19	143	172	335	176	69	14	0	189	194	3
473	92	37	86	167	60	7	158	42	20	131	181	373	144	68	9	21	190	196	3
474	107	56	104	231	71	11	219	31	25	172	226	705	217	71	19	11	189	196	3
475	90	36	74	171	60	8	157	42	19	128	177	367	123	61	6	21	197	204	3
476	84	44	77	150	59	5	152	44	19	143	175	344	177	77	8	2	183	187	3
477	86	41	66	133	56	6	136	49	18	136	155	274	162	74	5	14	183	189	3
478	107	54	98	210	66	11	218	31	24	169	221	704	216	71	14	0	188	197	3
479	105	54	106	215	68	10	208	32	24	166	217	640	218	69	14	23	189	199	3
480	86	41	64	148	61	5	150	45	19	138	165	333	173	80	5	8	182	185	3
481	85	33	40	115	57	3	112	61	17	119	130	184	127	86	12	21	181	183	3
482	100	52	104	189	59	10	208	32	24	163	220	642	197	70	1	22	187	198	3
483	101	55	108	228	69	12	215	31	24	168	229	684	214	71	2	16	188	199	3
484	91	39	83	176	59	7	169	39	20	132	190	426	142	67	0	24	192	199	3
485	85	34	53	127	58	6	116	58	17	121	137	197	127	70	3	20	185	189	3
486	112	50	110	186	56	11	214	31	24	159	232	676	203	71	18	27	191	202	3
487	91	36	77	157	56	7	155	42	19	126	177	361	123	65	8	15	195	201	3
488	99	48	104	196	63	10	201	33	23	152	221	604	199	73	8	4	188	197	3
489	83	37	54	118	55	4	129	52	18	127	146	245	140	81	4	13	180	184	3
490	91	39	88	189	63	9	175	38	21	132	197	457	156	69	0	23	191	198	3
491	103	49	100	194	60	10	185	35	22	160	202	518	178	62	13	8	198	208	3
492	100	46	81	187	61	9	166	40	20	154	189	415	175	63	13	9	198	207	3
493	93	47	88	200	66	7	173	38	21	151	197	452	205	66	0	3	195	202	3
494	109	54	109	225	68	11	214	31	24	169	226	675	212	68	11	32	189	202	3
495	116	53	110	231	67	12	217	31	24	165	231	692	222	67	16	28	192	206	3
496	89	48	85	189	64	8	169	39	20	153	188	427	190	64	16	5	195	201	3
497	88	37	57	132	62	6	135	50	18	125	151	265	144	83	16	16	180	184	3
498	82	37	66	126	54	7	132	52	18	127	148	252	142	72	17	7	183	187	3
499	91	40	98	192	64	9	177	38	21	135	194	465	165	66	9	35	195	205	3
500	106	53	98	193	60	10	215	31	24	169	224	681	218	73	8	21	188	197	3
501	106	48	107	202	61	10	207	32	24	153	227	635	200	70	5	28	190	203	3
502	90	50	90	188	61	10	181	36	21	158	211	492	220	69	6	19	191	199	3
503	95	45	105	208	64	10	187	36	22	150	202	520	158	64	7	32	198	211	3
504	105	54	100	220	69	10	221	30	25	170	232	718	202	73	0	13	187	199	3
505	98	51	96	203	66	10	188	35	22	157	207	533	231	68	10	1	191	199	3
506	94	38	88	179	60	7	170	39	21	131	188	435	144	66	2	28	195	204	3
507	89	38	80	169	59	7	161	41	20	131	186	389	137	68	5	15	192	197	3
508	109	54	103	205	63	11	222	30	25	175	229	720	213	71	6	14	187	200	3
509	83	37	54	131	61	4	135	50	18	127	152	271	141	85	3	6	180	183	3
510	117	52	110	228	65	12	212	31	24	163	228	668	220	66	21	25	194	205	3
511	88	38	58	137	60	5	148	46	19	131	163	319	157	86	12	0	180	183	3
512	98	50	90	192	63	9	177	37	21	155	195	472	197	65	10	1	193	201	3
513	109	49	109	193	59	10	207	32	24	156	225	635	213	70	13	31	191	202	3
514	108	52	109	182	55	12	216	31	24	171	229	687	214	72	10	28	189	201	3
515	101	46	105	195	61	10	198	34	23	150	213	578	195	66	7	38	192	205	3
516	95	47	81	176	59	7	168	39	20	152	196	425	185	67	4	4	191	198	3
517	108	54	105	203	62	11	202	33	23	164	216	608	235	68	12	3	190	200	3
518	82	37	59	134	63	7	135	51	18	128	151	264	143	82	11	24	179	185	3
519	104	51	108	193	59	11	217	31	24	163	232	694	203	72	15	22	190	201	3
520	87	37	60	132	57	6	128	52	18	129	154	243	132	71	1	14	186	192	3
521	82	36	54	117	53	7	125	54	18	126	146	229	128	78	1	5	180	184	3
522	99	43	89	195	63	8	186	35	22	144	210	521	166	68	6	13	191	199	3
523	90	49	83	187	63	7	176	37	21	154	205	467	222	70	1	2	189	195	3
524	107	53	108	213	64	12	206	32	23	163	216	627	202	65	21	22	194	205	3
525	91	38	75	136	53	6	144	47	19	131	165	305	149	69	1	7	186	191	3
526	86	38	86	175	60	9	170	39	21	134	191	433	138	68	1	28	191	199	3
527	89	45	77	188	64	9	161	41	20	151	190	390	174	66	4	2	194	201	3
528	93	34	72	144	56	6	133	50	18	123	158	263	125	63	5	20	200	206	3
529	90	34	66	158	59	7	140	47	18	124	165	298	117	61	1	3	201	207	3
530	112	50	104	197	58	11	208	32	24	159	223	639	186	67	15	22	191	202	3
531	104	53	108	206	61	11	217	31	24	168	226	694	209	67	0	9	188	201	3
532	84	38	83	141	54	7	149	45	19	132	177	327	149	74	6	29	185	191	3
533	104	51	105	168	54	10	208	32	24	162	220	641	221	72	9	20	187	197	3
534	98	47	109	202	59	11	199	34	23	154	207	586	165	61	1	33	194	208	3
535	101	51	98	194	60	10	195	34	22	161	219	572	219	67	0	10	192	201	3
536	101	52	101	197	62	9	188	35	22	162	208	527	203	67	14	15	193	202	3
537	106	52	101	213	64	11	201	33	23	158	214	607	204	65	2	4	192	204	3
538	98	42	90	192	61	9	178	37	21	144	189	480	138	61	3	8	199	208	3
539	105	51	108	201	62	11	220	30	25	163	232	711	202	72	12	16	189	200	3
540	97	55	104	219	71	9	211	32	24	171	222	658	223	74	1	24	186	196	3
541	104	55	100	201	66	10	214	31	24	173	224	680	221	74	1	1	185	194	3
542	93	45	81	177	64	7	160	41	20	147	180	383	188	70	11	11	192	199	3
543	108	54	109	189	57	11	220	31	25	174	229	709	214	70	12	23	189	201	3
544	97	45	76	175	60	9	157	42	20	149	180	370	169	63	16	12	198	206	3
545	91	39	72	133	55	7	146	46	19	132	170	314	149	77	9	18	184	189	3
546	115	53	100	205	64	11	220	30	25	166	229	710	214	71	21	11	189	199	3
547	101	51	112	201	59	11	214	32	24	162	223	667	194	65	0	36	190	206	3
548	95	37	71	171	61	9	157	43	20	134	178	365	125	63	5	40	196	208	3
549	107	54	108	228	68	12	218	31	25	170	223	700	224	67	13	25	190	204	3
550	85	40	75	137	56	7	152	44	19	134	173	339	160	76	7	16	182	187	3
551	89	40	89	174	58	8	177	37	21	133	202	471	155	70	7	18	189	196	3
552	89	36	69	162	63	6	140	48	18	131	164	291	126	66	1	38	193	204	3
553	92	45	76	162	57	7	159	41	20	147	184	381	177	69	8	10	190	195	3
554	97	44	95	202	66	9	188	35	22	144	216	526	175	72	15	11	190	197	3
555	88	48	90	178	60	8	175	38	21	152	200	460	198	68	13	16	192	199	3
556	104	49	105	209	61	11	207	32	24	157	217	637	168	64	0	19	193	207	3
557	102	55	101	213	67	12	222	30	25	177	226	719	213	71	2	21	187	199	3
558	93	39	86	180	59	9	167	39	20	134	186	418	129	63	6	17	197	204	3
559	96	37	74	187	68	8	159	42	20	134	183	378	134	69	3	16	190	197	3
560	107	51	103	182	56	11	213	31	24	162	226	673	217	72	2	4	188	198	3
561	90	39	89	181	62	8	175	38	21	132	200	458	154	70	11	15	189	195	3
562	113	48	98	208	62	9	203	33	23	151	216	613	183	64	17	29	193	204	3
563	86	40	66	138	59	4	137	49	18	133	162	279	151	74	6	14	186	190	3
564	101	56	101	231	72	10	217	31	24	171	232	698	216	72	2	6	187	197	3
565	113	53	93	197	62	11	216	31	24	165	221	688	196	72	6	25	188	199	3
566	101	48	85	191	60	11	175	38	21	153	192	458	187	62	5	22	197	210	3
567	108	54	103	212	65	11	208	32	24	162	228	648	240	71	9	0	189	197	3
568	91	40	83	166	60	8	160	41	20	133	189	383	155	72	5	7	186	191	3
569	105	53	108	206	63	12	222	31	25	168	226	712	201	71	15	35	189	203	3
570	94	43	69	161	59	7	152	43	19	143	175	349	187	67	12	11	193	198	3
571	109	54	103	220	66	11	214	31	24	167	229	677	212	70	1	23	188	201	3
572	109	53	103	210	63	11	219	30	25	172	229	707	212	71	6	3	188	199	3
573	108	53	104	181	56	11	220	31	25	167	226	712	214	72	15	18	189	199	3
574	104	54	101	197	64	11	213	31	24	172	218	669	222	74	14	4	187	196	3
575	89	43	77	147	54	8	144	46	19	146	163	308	174	64	13	5	194	201	3
576	93	39	63	146	58	7	128	52	18	134	149	246	158	63	9	7	198	204	3
577	90	36	85	184	64	6	160	41	20	125	187	385	139	66	9	31	195	203	3
578	97	53	105	225	71	12	221	30	25	167	226	713	202	70	3	20	186	200	3
579	85	33	50	104	53	4	115	59	17	118	136	193	127	83	1	30	179	185	3
580	108	56	103	234	73	10	221	30	25	174	232	718	214	73	8	3	187	197	3
581	96	40	100	178	58	8	181	37	21	134	205	486	160	68	5	34	192	202	3
582	106	52	108	207	64	12	221	31	25	168	229	709	200	73	22	38	190	205	3
583	84	36	75	136	55	6	140	48	18	125	166	290	138	71	4	36	189	195	3
584	104	53	101	190	63	10	213	32	24	166	218	664	202	74	13	21	188	198	3
585	86	40	63	135	56	5	133	50	18	135	152	262	166	70	9	2	187	191	3
586	96	41	69	153	56	7	141	47	18	141	162	297	169	61	11	8	202	209	3
587	95	46	104	208	66	9	191	35	22	148	210	543	169	68	0	28	190	200	3
588	85	38	75	132	54	7	147	46	19	131	171	318	145	75	7	25	183	188	3
589	105	53	105	184	57	11	211	31	24	168	224	661	218	71	0	15	186	197	3
590	89	38	77	161	62	7	149	45	19	129	174	327	153	71	6	21	188	193	3
591	98	55	104	213	67	9	206	32	23	167	223	629	220	72	5	19	187	196	3
592	85	40	66	136	58	6	142	48	19	137	164	295	164	77	2	22	182	186	3
593	100	47	88	190	60	10	171	38	21	155	186	440	169	59	15	18	201	210	3
594	96	50	94	215	67	9	187	35	22	158	214	525	214	67	8	6	193	201	3
595	110	46	100	197	61	9	193	34	22	149	209	561	160	65	11	7	194	203	3
596	87	41	66	140	58	6	148	46	19	136	164	318	178	79	19	2	181	185	3
597	89	47	83	169	61	8	164	40	20	150	189	402	190	72	7	10	187	193	3
598	110	53	104	223	66	10	211	32	24	164	223	659	210	67	5	16	190	203	3
599	92	37	80	180	67	8	154	43	19	129	180	353	144	69	6	9	190	195	3
600	89	35	52	121	57	4	122	55	17	125	139	220	128	82	5	13	181	184	3
601	105	51	105	197	60	11	191	35	22	162	207	545	194	64	18	4	196	205	3
602	94	40	85	186	62	9	169	39	20	139	184	430	133	61	2	9	200	210	3
603	108	51	100	206	63	10	196	34	23	159	214	576	201	65	7	16	194	205	3
604	100	43	92	197	62	10	180	36	21	143	200	489	153	64	6	9	195	205	3
605	89	38	82	156	59	8	153	43	19	129	179	351	137	70	1	1	187	192	3
606	108	49	103	200	62	10	206	32	23	155	227	635	215	72	6	16	189	198	3
607	110	54	102	201	64	11	213	31	24	171	222	669	221	73	17	16	188	198	3
608	100	54	102	206	65	10	198	33	23	164	224	587	240	72	4	11	187	196	3
609	105	45	100	195	61	10	198	33	23	149	214	586	186	67	8	5	192	200	3
610	107	53	108	211	63	11	219	31	25	168	228	704	198	69	10	21	190	203	3
611	97	41	88	184	59	9	175	38	21	140	192	459	147	63	1	5	196	205	3
612	104	53	101	199	65	11	213	31	24	168	216	667	221	72	12	12	187	198	3
613	105	54	108	234	70	12	215	31	24	168	226	687	228	68	4	22	189	201	3
614	102	48	105	214	64	10	201	33	23	152	214	600	178	64	0	25	192	204	3
615	102	51	104	217	67	10	204	32	23	162	220	621	195	68	3	19	188	197	3
616	109	52	104	199	60	12	215	31	24	162	220	691	212	67	11	7	189	199	3
617	98	48	101	203	65	9	197	33	23	152	216	584	174	68	2	5	189	197	3
618	93	51	90	209	69	8	183	36	22	156	211	506	230	70	6	1	189	196	3
619	96	40	78	170	58	7	174	38	21	139	197	455	160	68	3	29	191	200	3
620	91	36	72	162	60	8	150	44	19	133	166	334	121	63	2	22	196	205	3
621	95	53	95	202	65	10	193	34	22	160	220	559	237	71	3	2	188	196	3
622	91	43	72	142	56	7	149	45	19	140	168	327	165	72	13	23	186	191	3
623	115	51	100	201	60	12	196	34	23	162	207	573	184	62	22	1	198	208	3
624	103	53	106	172	55	10	212	32	24	168	220	660	223	73	16	24	187	197	3
625	98	38	78	191	65	8	169	39	20	136	197	430	141	67	9	20	192	199	3
626	91	36	83	162	61	8	142	47	19	128	163	298	137	63	0	31	193	200	3
627	96	45	101	201	66	9	192	34	22	143	218	552	195	73	3	19	189	197	3
628	111	50	103	199	60	11	211	31	24	156	223	663	188	68	9	9	190	200	3
629	109	47	96	206	64	9	198	33	23	150	219	586	191	70	4	13	190	198	3
630	107	54	96	201	62	12	218	31	24	170	221	694	217	71	2	21	187	198	3
631	107	55	103	213	68	11	219	30	25	172	221	709	216	70	10	7	187	197	3
632	115	52	100	203	62	10	217	31	24	165	229	697	214	72	14	4	188	197	3
633	90	39	85	160	59	7	163	41	20	131	189	396	158	71	7	13	186	192	3
634	111	53	108	211	61	11	207	32	23	167	217	636	216	64	21	2	196	205	3
635	88	45	82	155	56	8	154	43	19	149	180	357	170	69	3	0	188	193	3
636	103	51	105	174	56	11	210	32	24	163	222	650	222	73	8	9	187	196	3
637	79	38	55	120	55	5	142	48	19	128	153	295	145	81	4	2	180	183	3
638	104	53	108	204	64	11	220	31	25	172	226	707	203	71	14	30	189	203	3
639	93	42	98	192	63	9	185	36	22	138	206	508	173	70	10	21	189	197	3
640	87	38	71	123	53	8	137	49	18	127	158	277	145	75	0	9	181	186	3
641	108	49	109	204	61	11	212	31	24	159	229	665	215	71	16	11	190	199	3
642	92	46	83	154	56	6	160	41	20	148	185	382	184	71	10	5	186	191	3
643	82	36	51	114	53	4	135	50	18	126	150	268	144	86	15	4	181	182	3
644	94	46	77	169	60	8	158	42	20	148	181	373	181	67	12	2	193	199	3
645	93	39	87	183	64	8	169	40	20	134	200	422	149	72	7	25	188	195	3
646	106	54	101	222	67	12	222	30	25	173	228	721	200	70	3	4	187	201	3
647	86	36	78	146	58	7	135	50	18	124	155	270	148	66	0	25	190	195	3
648	91	41	84	141	57	9	149	45	19	143	170	330	158	72	9	14	189	199	4
649	93	41	82	159	63	9	144	46	19	143	160	309	127	63	6	10	199	207	4
650	90	43	66	157	65	9	137	48	18	146	162	281	164	67	3	3	193	202	4
651	86	34	62	140	61	7	122	54	17	127	141	223	112	64	2	14	200	208	4
652	86	36	70	143	61	9	133	50	18	130	153	266	127	66	2	10	194	202	4
653	89	42	85	144	58	10	152	44	19	144	173	345	161	72	8	13	187	197	4
654	89	36	51	109	52	6	118	57	17	129	137	206	125	80	2	14	181	185	4
655	84	37	53	121	59	5	123	55	17	125	141	221	133	82	7	1	179	183	4
656	85	45	80	154	64	9	147	45	19	148	169	324	174	71	1	4	188	199	4
657	89	43	85	160	64	11	155	43	19	151	173	356	174	72	5	9	185	196	4
658	100	46	90	172	67	9	157	43	20	150	170	363	184	67	17	7	192	200	4
659	90	48	86	306	126	49	153	44	19	156	272	346	200	118	0	15	185	194	4
660	88	37	51	105	52	5	119	57	17	128	135	207	125	86	8	16	179	183	4
661	94	49	87	137	54	11	158	43	20	162	178	366	186	75	5	5	183	194	4
662	93	46	82	145	58	11	159	43	20	160	180	371	189	77	2	4	183	194	4
663	91	43	70	133	55	8	130	51	18	146	159	253	156	70	1	8	190	194	4
664	89	47	81	147	64	11	156	44	20	163	170	352	188	76	6	13	184	193	4
665	94	36	66	151	61	8	133	50	18	135	154	265	119	62	9	3	201	208	4
666	89	47	84	133	55	11	157	44	20	160	169	354	176	74	5	9	182	192	4
667	85	39	68	119	52	5	128	53	18	135	148	241	142	75	8	8	182	187	4
668	96	40	70	120	50	8	137	50	18	141	162	269	139	80	10	13	183	183	4
669	86	44	78	164	68	9	142	46	18	147	168	305	171	70	1	11	190	201	4
670	89	42	89	147	61	11	151	44	19	145	170	338	163	72	11	23	187	199	4
671	94	36	68	127	54	7	127	52	18	132	155	242	116	66	1	2	195	196	4
672	89	41	84	141	58	9	149	45	19	145	172	330	162	72	4	18	188	200	4
673	86	37	60	115	54	5	119	56	17	132	141	209	129	72	2	8	186	190	4
674	94	48	87	162	64	10	157	43	20	161	179	363	186	75	4	15	184	195	4
675	95	42	85	174	66	9	153	44	19	144	168	347	150	65	11	5	196	204	4
676	94	42	68	150	64	7	128	52	18	143	154	246	159	69	14	5	192	196	4
677	92	38	60	130	62	5	114	58	17	132	135	194	137	72	14	5	190	194	4
678	89	40	77	159	65	9	144	46	19	141	168	314	143	70	0	5	190	200	4
679	94	48	83	162	64	10	156	43	19	153	177	357	187	74	4	14	185	196	4
680	93	43	85	133	54	10	155	44	19	153	174	351	165	75	12	13	184	196	4
681	95	47	88	162	64	11	159	43	20	157	176	371	185	71	12	13	189	198	4
682	90	48	78	142	59	11	160	43	20	160	173	370	185	76	10	11	183	192	4
683	92	40	82	163	63	9	146	45	19	140	165	319	137	64	9	0	199	206	4
684	85	45	71	150	63	8	143	46	19	147	171	307	179	72	2	3	187	196	4
685	90	46	80	143	62	11	159	43	20	156	169	366	186	74	17	7	185	193	4
686	97	45	88	173	67	10	157	43	20	157	173	365	157	67	8	12	192	200	4
687	98	39	68	121	49	7	134	51	18	142	164	261	134	75	4	1	186	186	4
688	89	47	83	322	133	48	158	43	20	163	229	364	176	97	0	14	184	194	4
689	86	48	75	136	58	10	161	43	20	163	170	371	185	75	3	1	183	192	4
690	87	42	64	150	64	10	133	50	18	142	157	264	159	67	7	1	193	201	4
691	91	42	80	162	66	8	148	44	19	145	171	331	147	70	3	5	189	199	4
692	100	46	85	164	64	11	163	42	20	163	176	387	170	71	18	0	189	196	4
693	93	36	64	165	69	8	136	49	18	136	161	279	127	67	2	29	193	204	4
694	89	40	79	154	64	9	144	46	19	139	168	311	149	71	8	7	188	197	4
695	93	42	70	131	56	7	127	53	18	145	156	240	152	74	5	4	189	190	4
696	98	38	70	125	52	8	130	53	18	139	157	243	132	74	0	13	186	185	4
697	94	45	81	166	67	9	145	46	19	147	164	313	179	66	11	14	194	202	4
698	93	48	84	150	63	11	156	44	20	165	171	354	188	73	8	15	185	195	4
699	89	44	70	137	58	6	136	49	18	146	168	273	166	78	10	3	186	187	4
700	87	40	81	162	68	10	146	46	19	139	167	317	157	70	0	13	189	199	4
701	93	47	85	163	66	11	156	44	20	158	172	355	178	74	7	15	183	195	4
702	89	40	58	137	58	7	122	54	17	140	146	225	150	63	7	4	199	206	4
703	87	47	81	149	62	9	147	45	19	152	171	325	181	72	0	6	188	198	4
704	86	37	69	150	63	8	138	48	18	134	163	284	124	71	1	6	189	195	4
705	85	39	57	126	56	6	114	58	17	135	134	195	145	64	17	7	197	202	4
706	88	44	85	139	56	11	157	43	20	155	176	363	175	76	5	16	184	195	4
707	93	41	79	159	63	8	144	46	19	150	165	309	134	67	4	9	195	203	4
708	94	35	66	147	62	9	131	50	18	127	159	258	115	66	8	7	196	201	4
709	85	35	47	110	55	3	117	57	17	122	136	203	139	89	5	9	180	184	4
710	93	42	64	158	68	9	134	49	18	142	163	268	170	71	7	13	192	201	4
711	90	48	78	134	56	11	160	43	20	167	169	366	185	76	1	14	182	192	4
712	85	47	75	121	53	9	157	44	20	165	168	358	176	77	1	7	182	191	4
713	93	41	75	124	51	7	140	49	18	141	164	284	149	77	5	15	184	185	4
714	95	38	66	126	52	8	133	52	18	140	158	253	140	78	11	8	184	183	4
715	84	44	80	140	58	11	156	44	20	157	166	349	176	74	5	17	183	193	4
716	93	47	85	161	65	12	155	43	19	157	179	354	178	76	2	9	184	196	4
717	89	40	60	131	56	6	118	56	17	137	143	209	153	65	10	8	193	199	4
718	89	35	70	138	58	7	126	53	17	128	147	237	112	64	4	19	199	207	4
719	86	39	60	140	60	7	119	55	17	134	140	212	141	61	7	8	200	207	4
720	83	37	62	113	53	6	122	55	17	129	143	218	135	79	0	7	181	185	4
721	91	43	88	157	61	9	149	45	19	157	165	326	140	64	1	26	197	207	4
722	96	45	80	162	63	9	146	46	19	148	161	316	161	64	5	10	199	207	4
723	89	46	77	125	52	10	156	44	20	160	171	351	177	78	7	17	183	191	4
724	88	43	84	136	55	11	154	44	19	150	174	350	164	73	6	2	185	196	4
725	98	38	66	130	55	7	130	51	18	138	160	251	123	69	3	12	191	194	4
726	89	45	81	246	102	43	155	44	20	160	200	347	177	90	9	17	183	192	4
727	93	36	63	139	57	8	132	50	18	136	158	260	121	67	3	27	193	201	4
728	89	36	68	149	60	8	133	50	18	134	153	265	119	62	6	18	201	209	4
729	93	45	83	142	56	10	157	43	20	155	180	364	188	75	1	21	184	197	4
730	93	40	62	117	49	7	131	52	18	145	160	249	156	78	8	6	184	184	4
731	91	41	66	131	56	9	126	53	18	144	159	237	155	72	3	10	191	194	4
732	89	37	51	111	54	5	120	56	17	127	138	213	147	82	7	4	181	183	4
733	93	43	88	170	66	9	150	45	19	147	164	334	143	65	2	17	196	206	4
734	98	44	78	160	63	8	142	47	18	148	160	300	171	63	19	2	201	207	4
735	89	44	76	125	54	10	156	44	20	151	163	352	176	76	12	12	184	193	4
736	97	45	91	161	63	10	151	45	19	148	166	334	171	65	18	20	197	205	4
737	95	44	84	158	62	10	145	46	19	148	163	312	166	64	10	6	199	206	4
738	91	46	78	148	61	9	147	45	19	152	168	323	199	70	13	11	189	200	4
739	89	47	85	147	58	10	153	44	19	151	175	349	186	74	13	7	186	197	4
740	90	47	85	149	60	10	155	43	19	155	179	355	186	75	1	5	185	196	4
741	97	47	87	164	64	9	156	43	20	149	173	359	182	68	1	13	192	202	4
742	87	36	53	117	58	4	118	57	17	125	138	205	138	85	9	15	180	183	4
743	94	49	87	159	64	10	157	43	20	158	179	363	203	75	4	0	183	194	4
744	90	47	85	145	58	9	152	44	19	155	175	345	184	73	4	2	186	197	4
745	94	47	85	333	138	49	155	43	19	155	320	354	187	135	12	9	188	196	4
746	91	38	70	160	66	25	140	47	18	139	162	296	130	67	4	11	192	202	4
747	93	44	90	166	65	10	153	44	19	156	170	348	143	66	9	17	194	203	4
748	87	42	64	150	64	10	133	50	18	141	157	265	159	67	7	0	193	201	4
749	96	39	77	160	62	8	140	47	18	150	161	294	124	62	15	3	201	208	4
750	85	45	82	133	56	11	159	43	20	156	170	362	173	76	10	21	183	193	4
751	96	39	58	117	51	6	133	52	18	139	154	255	150	86	6	0	181	182	4
752	84	37	70	145	62	9	136	48	18	134	159	280	140	68	11	9	194	202	4
753	85	37	68	145	60	6	130	51	18	130	150	253	121	65	3	14	195	203	4
754	93	42	64	123	51	7	135	51	18	144	164	262	155	78	16	12	185	185	4
755	90	47	73	136	58	11	161	42	20	153	172	376	185	77	11	8	183	191	4
756	91	36	60	126	56	6	119	56	17	130	139	211	118	67	6	14	192	198	4
757	89	46	74	135	59	9	157	44	20	158	170	356	177	79	12	3	184	191	4
758	91	39	82	164	68	10	143	46	19	137	164	308	158	68	13	9	191	201	4
759	92	43	70	124	52	6	139	49	18	144	164	282	172	79	4	16	183	185	4
760	83	45	73	161	68	8	142	46	18	144	169	305	179	71	10	3	191	199	4
761	90	41	62	147	60	6	128	52	18	141	149	246	157	61	13	4	201	208	4
762	92	40	62	144	59	8	127	52	17	139	149	241	150	62	13	1	204	210	4
763	91	44	66	151	63	7	137	48	18	146	166	280	167	72	1	9	188	194	4
764	89	46	78	150	63	11	160	43	20	160	170	367	176	73	5	9	185	194	4
765	86	38	76	143	59	8	142	47	18	131	167	301	138	71	5	10	189	196	4
766	90	48	78	143	60	11	161	43	20	159	172	374	186	75	2	2	184	193	4
767	94	43	82	136	54	10	155	43	19	149	176	359	161	74	1	6	186	197	4
768	88	36	53	113	57	3	118	57	17	128	137	204	136	88	7	14	180	183	4
769	95	46	92	159	63	11	160	42	20	157	176	372	171	70	7	21	189	200	4
770	89	38	74	138	59	7	136	49	18	133	167	278	128	72	7	7	189	193	4
771	88	39	76	155	62	8	137	48	18	137	156	281	124	63	3	6	201	209	4
772	93	40	73	139	58	6	136	49	18	138	166	275	137	73	0	0	187	188	4
773	90	43	81	231	97	46	150	45	19	149	200	332	164	91	5	9	186	196	4
774	89	41	63	134	59	6	123	55	17	137	148	223	150	76	12	3	186	188	4
775	90	39	57	114	48	7	135	51	18	139	155	261	151	85	12	8	183	182	4
776	98	44	88	176	67	10	158	43	20	149	173	367	154	66	14	9	194	202	4
777	86	40	66	139	59	7	122	54	17	139	145	225	143	63	7	11	202	208	4
778	88	34	58	140	59	6	127	52	18	130	148	243	113	63	4	10	199	206	4
779	88	44	84	135	55	12	155	44	20	158	176	351	164	75	7	11	183	195	4
780	92	40	66	111	48	7	139	50	19	140	159	277	148	85	12	19	182	183	4
781	86	38	58	119	56	4	118	57	17	129	140	208	152	78	9	2	184	186	4
782	97	35	66	151	64	8	128	52	18	129	148	246	112	66	6	2	195	200	4
783	96	45	87	169	67	10	154	44	19	149	167	351	174	67	9	8	192	201	4
784	89	47	80	131	54	11	160	43	20	163	175	369	174	77	1	7	182	193	4
785	89	36	68	141	59	8	139	47	18	130	166	291	127	73	7	1	189	196	4
786	85	35	64	129	57	6	116	57	17	125	138	200	123	65	1	23	196	203	4
787	83	40	59	116	53	7	132	52	18	137	145	250	157	84	12	6	177	183	4
788	88	42	66	133	57	6	123	54	17	144	147	227	160	66	8	4	193	198	4
789	93	39	78	164	66	8	139	48	18	140	157	290	126	64	4	7	201	208	4
790	84	37	70	150	61	7	137	49	18	140	156	278	121	64	0	23	196	205	4
791	86	39	62	129	59	6	116	57	17	135	137	203	145	64	7	9	199	204	4
792	90	49	85	141	57	11	159	43	20	167	173	365	186	75	1	11	182	192	4
793	83	37	49	112	55	5	122	55	17	128	144	219	146	85	8	16	180	184	4
794	98	39	68	136	56	8	131	52	18	144	159	251	134	72	4	10	186	187	4
795	90	48	81	144	60	9	150	44	19	156	173	333	200	75	2	0	185	195	4
796	90	42	63	144	59	7	131	50	18	142	154	259	162	65	15	3	197	204	4
797	97	41	62	133	56	7	130	52	18	143	158	247	157	78	5	7	184	186	4
798	96	46	88	160	64	9	151	44	19	148	173	339	182	70	15	11	192	199	4
799	86	35	44	110	54	2	119	57	17	121	139	208	137	90	6	1	180	183	4
800	89	45	85	149	59	11	158	43	20	158	177	362	173	75	12	16	183	193	4
801	91	39	77	153	59	8	139	48	18	139	159	289	123	62	8	17	201	209	4
802	88	35	60	143	59	7	128	52	18	129	147	246	109	62	1	6	202	209	4
803	90	43	72	157	64	8	136	49	18	145	158	279	167	64	4	6	201	209	4
804	90	47	85	161	64	10	163	42	20	160	177	389	185	73	9	0	185	195	4
805	94	46	91	175	70	12	157	43	20	155	172	358	192	69	15	21	190	200	4
806	95	46	76	162	66	11	162	42	20	155	175	381	172	74	8	4	184	193	4
807	90	46	73	137	58	11	161	43	20	158	170	373	186	76	0	9	182	193	4
808	90	46	75	133	55	11	160	43	20	161	173	369	171	77	0	16	182	192	4
809	92	41	66	125	52	7	139	50	18	143	160	275	161	81	7	19	182	184	4
810	93	43	78	162	64	8	137	48	18	145	156	281	159	63	17	12	203	210	4
811	82	43	70	250	105	55	139	48	18	145	231	289	172	99	4	9	190	199	4
812	92	35	58	136	58	6	122	55	17	132	142	222	116	64	6	17	197	203	4
813	94	49	82	137	56	10	159	43	20	160	176	367	186	76	10	7	183	192	4
814	94	45	85	163	68	10	157	44	20	156	170	357	176	73	17	11	187	195	4
815	94	45	85	160	63	10	158	43	20	157	174	367	162	68	1	6	189	199	4
816	91	37	76	138	55	8	132	51	18	135	157	256	124	69	0	12	191	192	4
817	85	45	73	167	69	8	143	46	18	148	173	307	176	71	2	0	190	199	4
818	88	40	55	114	53	7	132	53	18	139	142	249	158	87	0	7	176	183	4
819	96	44	85	166	66	10	155	43	19	150	167	355	159	67	3	10	192	202	4
820	96	46	88	174	68	10	155	43	19	148	173	354	182	69	14	15	194	202	4
821	91	42	66	142	58	9	134	50	18	142	163	268	164	69	6	5	191	197	4
822	93	46	85	169	66	9	151	44	19	147	169	339	179	67	0	4	195	204	4
823	85	36	51	115	56	5	119	57	17	124	139	207	127	81	13	5	181	184	4
824	91	41	64	148	61	8	129	51	18	142	161	249	153	68	6	12	194	201	4
825	86	39	58	125	55	5	117	57	17	134	140	204	148	69	7	6	190	194	4
826	94	50	84	138	57	10	156	44	20	170	171	351	187	77	5	6	182	191	4
827	90	44	69	152	64	7	135	49	18	145	165	272	162	75	3	2	187	191	4
828	94	37	72	146	60	9	133	50	18	135	161	262	128	69	2	7	192	195	4
829	96	39	64	111	48	8	134	52	18	141	160	258	139	80	7	20	183	184	4
830	88	42	64	151	62	8	130	51	18	142	150	253	161	63	3	2	203	210	4
831	87	37	52	116	54	6	115	58	17	126	135	196	144	74	11	22	186	190	4
832	93	37	70	126	52	9	127	53	18	137	156	238	119	71	2	13	191	190	4
833	86	43	68	150	64	9	138	48	18	143	161	285	174	69	6	0	192	201	4
834	83	40	53	114	53	6	132	53	18	140	142	247	157	86	8	7	176	183	4
835	88	41	80	147	62	8	146	45	19	144	169	318	161	71	4	16	188	197	4
836	90	48	77	132	56	10	157	44	20	164	169	354	187	78	1	3	182	191	4
837	90	48	85	157	64	11	161	43	20	167	175	375	186	74	3	16	185	195	4
838	95	41	82	170	65	9	145	46	19	145	163	314	140	64	4	8	199	207	4
839	89	42	66	125	53	7	131	51	18	144	162	254	162	73	10	17	188	191	4
840	95	49	82	139	56	11	159	43	20	162	173	365	185	75	7	10	182	191	4
841	87	45	66	139	58	8	140	47	18	148	168	294	175	73	3	12	188	196	4
842	95	43	76	142	57	10	151	44	19	149	173	339	159	71	2	23	187	200	4
843	90	44	72	157	64	8	137	48	18	144	159	283	171	65	9	4	196	203	4
844	89	46	84	163	66	11	159	43	20	159	173	368	176	72	1	20	186	197	4
845	85	36	66	123	55	5	120	56	17	128	140	212	131	73	1	18	186	190	4
846	95	48	83	178	72	10	162	42	20	159	176	379	184	70	6	16	187	197	4
